1 **Isolation and characterization of bacteriophages against IMP-6-producing *Klebsiella***  
2 ***pneumoniae* isolated from clinical settings in Japan**

3 Kohei Kondo<sup>a</sup>, Satoshi Nakano<sup>a</sup>, Junzo Hisatsune<sup>a</sup>, Yo Sugawara, Michiyo Kataoka<sup>b</sup>,  
4 Shizuo Kayama<sup>a</sup>, Motoyuki Sugai<sup>a</sup>, Mitsuoki Kawano<sup>c</sup>#

5

6 <sup>a</sup>Antimicrobial Resistance Research Center, National Institute of Infectious Diseases,  
7 Higashimurayama, Tokyo, Japan

8 <sup>b</sup>Department of Pathology, National Institute of Infectious Diseases,  
9 Toyama, Shinjuku-ku, Tokyo, Japan

10 <sup>c</sup>Department of Nutritional Sciences, Nakamura Gakuen University, Jonan-Ku, Fukuoka,  
11 Japan

12

13 Notes: Kohei Kondo and Mitsuoki Kawano contributed equally to this work.

14

15 Running Head: Phages infecting *bla*<sub>IMP-6</sub>-harboring *K. pneumoniae*

16 #Address correspondence to Mitsuoki Kawano, [mkawano@nakamura-u.ac.jp](mailto:mkawano@nakamura-u.ac.jp)

17

18     **Abstract**

19     Carbapenemase-producing *Enterobacteriaceae* (CPE) are one of the most detrimental  
20     species of antibiotic-resistant bacteria worldwide. Phage therapy has emerged as an  
21     effective strategy for the treatment of infections caused by CPE pathogens. In west Japan,  
22     the increasing occurrence of *Klebsiella pneumoniae* harboring the pKPI-6 plasmid, which  
23     encodes *bla*<sub>IMP-6</sub>, is a growing concern. To manage such major antimicrobial-resistant  
24     pathogens, we isolated 29 novel phages from sewage in Japan, targeting 31 strains of *K.*  
25     *pneumoniae* and one strain of *Escherichia coli* harboring the pKPI-6 plasmid. Electron  
26     microscopy analysis indicated that of the 29 isolated phages, 21 (72.4%), 5 (17.2%), and 3  
27     (10.3%) belonged to *Myoviridae*, *Siphoviridae*, and *Podoviridae*, respectively. Host range  
28     analysis revealed that 20 *Myoviridae* members in isolated phages infected 25–26 strains of  
29     *K. pneumoniae*, indicating that most of the isolated phages have a broad host range. The *K.*  
30     *pneumoniae* Kp21 can only be infected by phage øKp\_21, while Kp22 can be infected by  
31     more than 20 phages. We applied a phage cocktail, which consists of 10 phages, against  
32     Kp21 and Kp22 and found that the phage cocktail delayed the emergence of phage-resistant  
33     bacteria for Kp21 strain but not for the Kp22 strain. Furthermore, phage-resistant Kp21  
34     (Kp21r) became prone to be infected from other bacteriophages as a “trade-off” of

35 resistance to phage  $\phi$ Kp\_21. Our proposed phage set has an adequate number of phages to  
36 combat the *K. pneumoniae* strain isolated in Japan. Notably, our work demonstrates how a  
37 suitable phage cocktail diminishes the occurrence of phage-resistant bacteria.

38

### 39 **Importance**

40 *Klebsiella pneumoniae* harboring the plasmid carrying *bla*<sub>IMP-6</sub> is becoming an increasingly  
41 hazardous species in Japan. We collected and characterized 29 novel bacteriophages that  
42 infect *K. pneumoniae* carrying the pKPI-6 plasmid, isolated in clinical settings of west  
43 Japan. Our phages showed broad host ranges. We applied a phage cocktail treatment  
44 constructed from 10 phages against two host strains, Kp21 and Kp22, which show different  
45 phage susceptibility patterns each other. Although the phage cocktail delayed phage-  
46 resistant Kp21 emergence, the emergence of phage-resistant Kp22 could not be delayed.  
47 Moreover, phage-resistant Kp21 became sensitive to other phages, which did not originally  
48 infect wild-type Kp21. Our study demonstrates how a suitable phage cocktail can diminish  
49 the occurrence of phage-resistant bacteria.

50

51

52     **Introduction**

53     Carbapenemase-producing *Enterobacteriaceae* (CPE) are high-risk bacteria in clinical  
54     settings globally. *Klebsiella pneumoniae*, a member of the family *Enterobacteriaceae*,  
55     causes nosocomial infections and is one of the most common causes of life-threatening  
56     infections caused by multidrug-resistant bacteria worldwide (1). *bla*<sub>IMP</sub> genes are classified  
57     as class B metallo- $\beta$ -lactamases. *bla*<sub>IMP-1</sub> and *bla*<sub>IMP-6</sub> genes are predominantly detected in  
58     CPE isolated from Japan (2, 3), whereas other types of carbapenemases (NDM, KPC, and  
59     OXA-48) are mainly detected in CPE isolated from other countries (4). *Klebsiella*  
60     *pneumoniae* with the pKPI-6 plasmid encoding *bla*<sub>IMP-6</sub> (5), which is susceptible to  
61     imipenem but resistant to meropenem, has become increasingly common in clinical settings  
62     in west Japan since their emergence in 2009 (6). These strains are therefore of major  
63     concern in clinical settings because of the inappropriate selection of antibiotics for  
64     treatment.

65     Recently, research on the use of bacteriophages as an alternative for the treatment of  
66     infections caused by antimicrobial-resistant bacteria has become increasingly prevalent (7).  
67     Phage therapy targeting *Staphylococcus aureus* (8) and *Mycobacterium tuberculosis* (9) has  
68     been administered successfully to patients. Furthermore, a recent study has demonstrated

69 effective phage therapy targeting CPE in clinical settings (10). Thus, phage therapy is now  
70 recognized as a highly reliable strategy to combat nosocomial pathogens.

71 Following the use of phages against bacteria, phage-resistant bacteria have emerged (11)  
72 *in vitro* (12) and *in vivo* (13). The phage cocktail strategy, which consists of several types  
73 of phages, is often used to prevent the emergence of phage-resistant bacteria. A phage bank  
74 is useful to quickly apply the phage cocktail in clinical settings (14), especially in  
75 emergency cases. As national phage banks are pertinent for the instant management of  
76 contingent nosocomial pathogen outbreaks, several countries have constructed public phage  
77 banks for the efficient use of phage therapy (14, 15). However, there is no public phage  
78 bank optimized for the trend of antibiotic-resistant bacteria in Japan.

79 In this study, we isolated and characterized 29 bacteriophages targeting IMP-6-producing *K.*  
80 *pneumoniae* and *Escherichia coli* clinical isolates as the first step in constructing a public  
81 phage library in Japan. We also describe the mechanisms by which phage cocktails reduce  
82 the emergence of phage-resistant *K. pneumoniae*.

83

84

85

## 86 Results

### 87 1. Phage hunting and morphological analysis of novel bacteriophages

88 We performed phage hunting from the sewage system in west Japan, which yielded 29  
89 phages against 32 *K. pneumoniae* and one against *E. coli* (Ec1) isolates harboring pKPI-6.  
90 Each phage name number indicates the corresponding host number. For instance, øEc\_1  
91 and øKp\_1 phages were isolated from *E. coli* Ec1 and *K. pneumoniae* Kp1, respectively, as  
92 their corresponding hosts. All phage-corresponding hosts combinations are listed in Table  
93 S1. We did not discover appropriate phages against *K. pneumoniae* (Kp2, Kp6, Kp25, Kp28,  
94 and Kp29). Morphological analysis using electron microscopy indicated that 21/29  
95 (72.4 %) isolated phages belonged to *Myoviridae*, 5/29 (17.2 %) belonged to *Siphoviridae*,  
96 and 3/29 (10.3 %) belonged to *Podoviridae* (Fig. 1). All TEM images of *Myoviridae* were  
97 shown in Fig. S1 The transmission electron microscopy image strongly suggested that  
98 øEc\_1 belonged to *Podoviridae* and C3 morphotype (honeycomb-like) phages (16–18),  
99 which possess an elongated head (height, 136.6 nm ± 1.8 nm; width, 61.7 nm ± 3.6 nm; tail,  
100 15.8 nm ± 2.3 nm) (Fig. 1). øEc\_1 formed turbid plaques on the *E. coli* Ec1 strain. øKp\_21  
101 was classified as *Myoviridae* (height, 133.8 nm ± 3.1 nm; width, 137.1 nm ± 1.1 nm; tail,

102 109.7 nm  $\pm$  1.0 nm) (Fig. 1). Furthermore, øKp\_21 had a branched tail (tail spike) fiber and  
103 formed clear plaques on the lawn of *K. pneumoniae* Kp21.

104

## 105 **2. Host range determination and analysis of the correlation between plaque size and** 106 **efficiency of plating (EOP)**

107 We next determined the host range and its EOP for all phage–host combinations (Fig. 2)  
108 (Table S2). We selected two standard strains (ATCC BAA 1705, ATCC BAA 1706) as the  
109 control for *K. pneumoniae*. Although no novel phages against five hosts (Kp2, Kp6, Kp25,  
110 Kp28, and Kp29) were isolated, the host range experiment indicated that several isolated  
111 phages formed plaques against Kp2, Kp6, Kp25, and Kp29 but not Kp28 (Fig. 2). Phages  
112 øKp\_8 and øKp\_17 showed the broadest host range (26/32 *K. pneumoniae* host strains).  
113 Most phages (øKp\_3, øKp\_5, øKp\_9, øKp\_10, øKp\_12, øKp\_13, øKp\_15, øKp\_16,  
114 øKp\_18, øKp\_19, øKp\_20, and øKp\_26) showed plaque formation on 25 host *K.*  
115 *pneumoniae* strains, indicating that these phages have a broad host range (infecting  $\geq$  25  
116 host strains). In contrast, several phages showed a narrow host range (infecting  $\leq$  4 host  
117 strains). For example, øKp\_31 infects Kp15, Kp17, Kp26, and Kp31. øKp\_27  
118 (*Siphoviridae*), øKp\_30 (*Podoviridae*), and øKp\_32 (*Myoviridae*) infect only Kp27, Kp30,

119 and Kp32, respectively (Fig. 2). Overall, our phage set can handle the *K. pneumoniae*  
120 isolated in clinical settings and has an adequate number of phage types to construct a phage  
121 cocktail against *K. pneumoniae* in this study.

122 We observed that high EOP values indicated the formation of large plaques. Thus, we  
123 performed correlation analysis between EOP values and plaque size of eight representative  
124 phages that showed different host range pattern. Pearson's correlation coefficients (R  
125 values) were 0.75 for øKp\_1, 0.86 for øKp\_7-1, 0.70 for 7-2, 0.55 for øKp\_14, 0.25 for  
126 øKp\_21, 0.80 for øKp\_24, 0.83 for øKp\_27, and 0.65 for øKp\_31 (Fig. S2). Therefore,  
127 plaque size was positively correlated with the EOP.

128

### 129 **3. OD<sub>600</sub> kinetics of *K. pneumoniae* challenged with phages**

130 OD<sub>600</sub> kinetics were analyzed for all phage–indicator host combinations. Individual phages  
131 were added to cultures of indicator hosts at 10<sup>8</sup> pfu/ml. The OD<sub>600</sub> decreased 1 h after each  
132 phage was added, while that of the Ec1 and øEc\_1 mixture did not decrease and  
133 approximated that of the host strain without any phages (Fig. 3). The OD<sub>600</sub> in all phage  
134 combinations increased again 6–10 h after the addition of each phage. This result indicates  
135 that phage-resistant bacteria emerged in almost all the phage–host combinations.



136

#### 137 **4. Cocktail analysis of phage-resistant bacteria Kp21**

138 Kp21 can only be infected by øKp\_21, while Kp22 can be infected by 23 phages (Fig. 2).

139 Furthermore, øKp\_21 infects 18 hosts including Kp21, but øKp\_22 infects Kp22 and Kp31

140 strains only (Fig. 2). We focused on these contrasting strains, øKp\_21 and øKp\_22, for the

141 phage cocktail experiment. The phage cocktail consisted of 10 phages (øKp\_16–26), which

142 include 8 *Tevenviridae*, 1 *Alcyoneusvirus*, and 1 *Siphoviridae*. In the Kp21 and øKp\_21

143 combination, the OD<sub>600</sub> increased again after 6 h and reached that of the negative control

144 after 24 h (Fig. 4A). However, the OD<sub>600</sub> did not increase until 14 h when Kp21 was

145 combined with the phage cocktail (Fig. 4A). Therefore, the phage cocktail delayed the

146 emergence of phage-resistant Kp21 in the *in vitro* assay. However, the OD<sub>600</sub> of the cocktail

147 against Kp22 increased again after 10 h, which is the same time taken as the OD<sub>600</sub> of

148 single øKp\_22 (Fig. 4C). This result indicates that the phage cocktail failed to delay the

149 emergence of phage-resistant Kp22. We isolated øKp\_21-resistant Kp21 (Kp21r) and

150 øKp\_22-resistant Kp22 (Kp22r) according to the method described in the Materials and

151 methods section. Although the OD<sub>600</sub> kinetics in the mixture of Kp21r and øKp\_21 did not

152 decrease and approximated that of Kp21r without any phages, the OD<sub>600</sub> reduced in the

153 Kp21r–phage cocktail combination (Fig. 4B). This result indicates that the Kp21r strain is  
154 resistant to phage 21 but susceptible to the phage cocktail. However, OD<sub>600</sub> did not  
155 decrease in either Kp22r-øKp\_22 or Kp22r-cocktail combinations, suggesting that the  
156 phage-resistant Kp22r is not susceptible to either øKp\_22 or the phage cocktail (Fig. 4D).

157

## 158 **5. Shifting of phage sensitivity between Kp21 and Kp21r**

159 To analyze the susceptibility of Kp21r to the phage cocktail, we compared phage plaque  
160 formation between Kp21 and Kp21r. According to the host range analysis, no phages  
161 formed plaques on Kp21. However, the Kp21r strain became susceptible to øKp\_16, 17, 18,  
162 19, 20, 23, and 26, which are of the genus *Tevenviridae*. This result suggests that Kp21r  
163 becomes prone to be infected from other phages in compensation for resistance to øKp21  
164 (Fig. 5A). Furthermore, the Kp21r strain showed a sparse background on LB agar plates  
165 containing *Tevenviridae* viruses (Fig. 5A). This sparse background is not caused by  
166 confluent plaque lysis. This implies a mechanism by which the phage cocktail prevents the  
167 emergence of phage-resistant bacteria without phage infection. To determine the efficiency  
168 with which phages can kill the Kp21r strain, we measured the colony-forming unit (cfu)  
169 values of Kp21 and Kp21r by mixing the individual phages used in the phage cocktail. In

170  $\phi$ Kp\_21, the cfu of Kp21 was reduced ( $10^4$  cfu/ml), but that of Kp21r was almost the same  
171 as that of the control Kp21r ( $10^7$ – $10^8$  cfu/ml). In  $\phi$ Kp\_22 and  $\phi$ Kp\_24, cfu/ml in Kp21r was  
172 not significantly decreased compared to that in Kp21. These results are consistent with our  
173 observation that these phages are incapable of infecting Kp21 and Kp21r. In other phages,  
174 the cfu of Kp21r strain significantly decreased compared to that of Kp21. In particular,  
175 colonies were not detected for  $\phi$ Kp\_18, 19, 20, or 23-Kp21r combinations. Our results  
176 indicate that Kp21r viable cells were wiped out by phages that newly infected Kp21r.

177

## 178 **6. Characterization of Kp21 and Kp21r**

179 To analyze the differences between the strains Kp21 and Kp21r, we performed an  
180 adsorption assay of  $\phi$ Kp\_21 for Kp21 and Kp21r. The assay showed that unadsorbed  
181  $\phi$ Kp\_21 for the Kp21r strain was approximately 100 % at 5 min after the phage was added  
182 to the Kp21 strain, while for Kp21, the value was 2–5 % (Fig. 6A). In addition, no plaques  
183 were detected when  $\phi$ Kp\_21 was input at  $10^9$  pfu (EOP <  $10^{-9}$ ) (Fig. 6B). These results  
184 indicate that  $\phi$ Kp\_21 loses its ability to adsorb Kp21r. Next, we detected single nucleotide  
185 polymorphism (SNPs) between Kp21 and Kp21r. Insertion mutations were detected in two  
186 genes, *thpA* (encoding the inner membrane protein) and *cpsA* (encoding exopolysaccharide

187 synthesis genes) as shown in Table S4; this result suggests that the øKp\_21 phage  
188 recognizes the capsular polysaccharide of Kp21. Insertion mutations of *cpsA* in Kp21r  
189 occur at the 452<sup>nd</sup> nucleotide position and a stop codon appeared at the 463<sup>rd</sup> nucleotide  
190 position (Fig. 6C). Therefore, 141 amino acids are truncated at C-terminus CpsA of Kp21r  
191 (154 amino acids long); the wild-type CpsA amino acid length is 295. This severe  
192 truncation can result in deficient capsular polysaccharide biosynthesis of Kp21r.

193

## 194 **Discussion**

195 Phage therapy is increasingly being recognized as an effective strategy to combat  
196 antimicrobial-resistant bacteria, especially nosocomial pathogens (8–10, 19). A recent study  
197 demonstrated that inflammation in a mouse model of inflammatory bowel disease (IBD)  
198 was suppressed by the eradication of *K. pneumoniae* using a phage cocktail. This suggests  
199 that phage therapy targeting *K. pneumoniae* successfully treats IBD in humans (20).

200 In this study, we isolated and characterized novel bacteriophages targeting antimicrobial-  
201 resistant *K. pneumoniae* harboring the pKPI-6 plasmid, which encodes *bla*<sub>IMP-6</sub>. We isolated  
202 29 novel phages from sewage in west Japan against the *K. pneumoniae* and *E. coli*  
203 harboring pKPI-6 plasmid. Genome sequence analysis suggests that *Tevenviridae* members

204 in this study except øKp\_22 are very similar in genome size and identity; thus, these phages  
205 were considered to be variants of the same species (Table S1). We were concerned that our  
206 phages encode antimicrobial resistance (AMR) and virulence factor (VF) genes, because  
207 phages can transfer these genes in clinical settings (21–23). However, our analysis  
208 indicated that neither AMR nor VF genes were detected in isolated phage genomes, thereby  
209 allowing the application of these phages in clinical settings.

210 Our host range experiment analysis showed that most of the phages, which were classified  
211 as *Myoviridae*, formed plaques on the 25 *K. pneumoniae* strains. Specific host strains (*K.*  
212 *pneumoniae* Kp12 to Kp20) showed higher EOP (Fig. 3) against most phages, suggesting  
213 that several strains exhibit high susceptibility to novel phages isolated from west Japan.  
214 Moreover, host range experiment results indicated that EOP and plaque size are positively  
215 correlated in several phages such as øKp\_1, 7, 7-1, 14, 24, 27, and 31. To the best of our  
216 knowledge, few reports have described the correlation of these factors (24); however, we  
217 hypothesize that phages that show a larger plaque size have a greater burst size and/or  
218 adsorption efficacy. These results can facilitate the development of novel phages that have  
219 a higher virulence to the host bacteria; moreover, our work can also guide the selection of  
220 phage strains for developing a phage cocktail (25, 26).

221 The phage cocktail experiment revealed that Kp21r became newly susceptible to other  
222 phages in the phage cocktail. Phage cocktail analysis showed that Kp22 did not retard the  
223 emergence of phage-resistant Kp22 (Kp22r), which was in contrast to the results for the  
224 Kp21 strain. This antithetical result of the Kp21 and Kp22 cocktail experiment implies that  
225 the phage cocktail is not an all-round strategy; however, it remains the most reliable  
226 strategy to combat bacteriophages, thus far. No universal methods or guidelines have been  
227 established for developing the cocktail, and it is difficult to predict the combination of  
228 phages that can inhibit the emergence of phage-resistant bacteria with the greatest  
229 efficiency. However, it has been reported that several phages that recognize different  
230 receptors of the host should be mixed to efficiently decrease the occurrence of phage-  
231 resistant bacteria (27–29).

232 Our experimental results indicate that Kp21r became infected by  $\phi$ Kp\_16, 17, 18, 19, 20,  
233 23, and 26, while Kp21 was only subject to infection by  $\phi$ Kp\_21 (Fig. 5). This result  
234 suggests that phage-resistant bacteria is easily attacked by other phages that exist in  
235 environment during evolutionary arms race. Adsorption assays explained that  $\phi$ Kp\_21 lacks  
236 the ability to adsorb Kp21r. SNP analysis of Kp21 and Kp21r revealed that insertion  
237 mutations occurred in at least two genes; *cpsA*, encoding putative capsular biosynthesis

238 protein and *thpA*, encoding sugar ABC transporter substrate-binding protein. It has been  
239 reported that capsular polysaccharide function as the barrier to infect phages (30). A recent  
240 article reports a novel phage that recognizes the capsular polysaccharide of *K. pneumoniae*  
241 (31), and accordingly, we speculate that capsular polysaccharide is one of the factors  
242 allowing  $\phi$ Kp\_21 to adsorb to its host Kp21. We found that *Myoviridae*, in the phage  
243 cocktail, diminished the lawn density of Kp21r on the plates. We posit that this  
244 phenomenon was caused by lysis mechanisms such as “lysis from without (LO)” or “rapid  
245 lysis” (32, 33). Gp5 in T4 phage, which encodes tail lysozyme, is known to cause LO (34).  
246 Gp5 forms the complex with T4 phage tail and when T4 phage adsorbs to their host, Gp5  
247 degrades the peptidoglycan layer. We found that members of *Myoviridae*, used for the  
248 phage cocktail in this study, encode the baseplate with tail lysozyme (Table S3), which has  
249 the capability of peptidoglycan degradation. SNPs analysis of Kp21 and Kp21r suggests  
250 that Kp21r possesses deficient capsular polysaccharide, and thus, phage tail protein  
251 encoded in *Myoviridae* may more efficiently degrade Kp21r peptidoglycan and result in  
252 rapid lysis. Some studies have reported that phage-resistant bacteria become susceptible to  
253 antibiotic due to mutation in the genes involved in antibiotics resistance and showed that  
254 phages and antibiotics combination effectively kills the target bacteria (35–38). Our results

255 demonstrate that the combinations of phage and phage-encoded tail lysozyme efficiently  
256 eliminate and/or inhibit the phage-resistant bacterial growth (39).

257 In conclusion, we isolated and characterized novel phages infecting *K. pneumoniae* and *E.*  
258 *coli* harboring the pKPI-6 plasmid; this is the first step in the construction of a public phage  
259 bank and phage therapy in Japan. Overall, our phage sets can diminish the threat of *K.*  
260 *pneumoniae* harboring the pKPI-6 plasmid isolated in clinical settings. Our phage sets also  
261 contain an adequate number of phage types for developing a phage cocktail. However, the  
262 development of a high-throughput method is required for efficiently isolating additional  
263 novel phages.

264

## 265 **Materials and Methods**

### 266 **1. Phage isolation and host information**

267 Thirty-two IMP-6-producing isolates of *K. pneumoniae* and one IMP-6-producing isolate  
268 of *E. coli* were isolated from clinical settings in western Japan. Further, 29 novel phages  
269 were isolated from sewage in west Japan. Briefly, 100 µl of sewage was mixed with an  
270 overnight culture of the indicator host, and the mixture added to 3 ml of YT-soft agar prior  
271 to inoculation onto Luria–Bertani (LB) agar. The plates were incubated at 37°C overnight,



272 and thereafter, single-plaque isolation was performed. Plaques were suspended in 1 ml LB  
273 medium and incubated for 2 h. Next, 50  $\mu$ l chloroform (Fujifilm Wako Pure Chemical  
274 Corporation, Osaka, Japan) was added to each solution; the mixture was vortexed and then  
275 centrifuged at 10,000  $\times$ g for 10 min at 4°C. Supernatants and individual indicator hosts  
276 were mixed and incubated at 37°C overnight on LB agar plates. The single-plaque isolation  
277 procedure was repeated three times, and isolated phages were stored at 4°C until use. Kp21  
278 was renamed from the *K. pneumoniae* f22 strain.

279

## 280 **2. Phage propagation and purification**

281 Pre-cultured host strains were inoculated into 3 ml fresh LB medium (1:100) and  
282 incubated at 37°C until the OD<sub>600</sub> reached 0.5. Thereafter, each phage that was originally  
283 isolated using the indicated host was added and incubated at 37°C with shaking at 200 rpm  
284 for 4–6 h. Following lysis, 50  $\mu$ l chloroform (FUJIFILM Wako Pure Chemical  
285 Corporation) was added to 1 ml of the phage lysate, vortexed, and then centrifuged at 9,100  
286  $\times$ g for 10 min. Supernatants were filtered using a 0.22  $\mu$ m pore-size membrane (Millipore,  
287 MA, USA). Cesium chloride (CsCl) density gradient phage purification was performed as  
288 described previously (40, 41) with some modification. Briefly, 10% polyethylene glycol

289 6000 (FUJIFILM Wako Pure Chemical Corporation) and 0.5 M NaCl were added to phage  
290 lysates and kept at 4°C for 1.5 h. Thereafter, phage lysates were centrifuged at 10,000 ×g  
291 for 30 min. Phage pellets were suspended in 1 ml TM buffer (10 mM Tris-HCl, and 5 mM  
292 MgCl<sub>2</sub> [pH 7.5]), and 100 µg/ml DNase I (Roche, Basel, Switzerland) and RNase I  
293 (Thermo Fisher Scientific, MA, USA) were added to the phage solution and incubated at  
294 37°C for 30 min. CsCl (FUJIFILM Wako Pure Chemical Corporation) at three different  
295 weights ( $\rho = 1.3, 1.5, \text{ and } 1.7$ ) and phage solution were overlaid in tubes and  
296 ultracentrifuged (Optima MAX-TL; Beckman Coulter, California, USA) at 100,000 ×g for  
297 1 h. Phage bands were then collected and dialyzed in SM buffer (25 mM Tris-HCl [pH, 7.5],  
298 100 mM NaCl, and 8 mM MgSO<sub>4</sub>).

299

### 300 **3. Phage propagation and electron microscopic imaging**

301 Copper mesh grids coated with formvar and carbon (Veco grids; Nissin EM, Tokyo,  
302 Japan) were glow-discharged and placed on drops of the phages for 1 min. Thereafter, they  
303 were rinsed with distilled water and stained with a 2% uranyl acetate solution. Samples  
304 were examined using transmission electron microscopy (HT7700; Hitachi Ltd., Tokyo,  
305 Japan) at 80 kV.

306

307 **4. Host range determination and EOP assay**

308 Each host was incubated at 37°C overnight, and 100 µl of each overnight culture was  
309 mixed with 100 µl of each phage. Thereafter, 5 ml of 0.6 % soft agar was added to the  
310 host–phage mixture and inoculated onto LB agar. The plates were then incubated at 37°C  
311 overnight, and the number of plaques in each plate counted. EOP was calculated using the  
312 formula below:

313 
$$\text{EOP} = \frac{\text{plaques of individual phage and host combination}}{\text{plaques of indicator host and phage combination}}$$

314  
315 The detection limit of EOP was set as  $10^{-4}$  pfu. EOP was measured for all phage–bacteria  
316 combinations. Each plaque image was taken using scan1200 (Interscience, Montpellier,  
317 France) for measuring plaque sizes. Plaque size ( $\text{mm}^2$ ) was measured using Fiji  
318 (<https://fiji.sc>) version 2.3.0, with 1 mm being 11 pixels. For very small plaques, the edge  
319 of individual plaques was detected using the “find edge” tool in Fiji. Ten plaque areas were  
320 measured in each phage–host combination if the number of plaques on the plate was more  
321 than 10.

322

323 **5. OD<sub>600</sub> kinetics and cocktail experiment**

324 The host colony was pre-cultured in LB medium overnight at 37°C. Subsequently, the pre-  
325 cultured bacteria were inoculated (1:100) into fresh LB medium and incubated at 37°C with  
326 shaking at 200 rpm until OD<sub>600</sub> = 0.1. Each indicated phage was added to the culture at 1.0  
327 × 10<sup>8</sup> pfu/ml and the mixed culture incubated at 37°C with shaking at 200 rpm. OD<sub>600</sub> was  
328 measured at appropriate times for 24 h. In phage cocktail experiments, 10 phages (øKp\_16,  
329 17, 18, 19, 20, 21, 22, 23, 24, and 26) were mixed at 1.0 × 10<sup>7</sup> pfu/ml of each individual  
330 phage. All experiments in this section were performed in triplicate.

331

332 **6. Host and phage genome sequences**

333 All phage genomic DNA was extracted using Norgen phage DNA isolation kit (Norgen  
334 Biotak, Birmingham, UK) following the manufacturer's instructions. Each phage DNA  
335 library was constructed using the QIA seq FX DNA library kit (Qiagen), and sequencing  
336 was performed using the Illumina MiSeq platform. Genome assembly was performed using  
337 Shovill with default settings. Phage contigs were filtered with the contig length < 200 and  
338 coverage < 25. Bacteria strains and phage strains were annotated using prokka (42) or  
339 PGAP (43) version 2021-07-01.build5508. For Nanopore long-read sequencing, we used

340 the Monarch HMW DNA Extraction Kit for Tissue (NEB, MA, USA) following the  
341 manufacturer's instructions.

342 A long-read library was prepared using the Rapid Barcoding kit (Oxford Nanopore  
343 Technologies, Oxford, United Kingdom, catalog number: SQK-RBK004) and sequenced  
344 with an R9 flow cell (Oxford Nanopore Technologies, catalog number: FLO-MIN106) and  
345 a GridION device (Oxford Nanopore Technologies). Basecalling was performed using  
346 Guppy version 5.0.12 with high accuracy mode. The obtained long reads and MiSeq short  
347 reads that were trimmed using fastp v0.20.1 were assembled using Unicycler v0.4.8 with  
348 default parameters. Annotation was conducted using PGAP version 2021-07-01.build5508.

349

## 350 **7. Bioinformatics analysis**

351 For protein prediction in phages, we constructed the phage protein databases from  
352 International Committee on Taxonomy of Viruses (ICTV), which consists of 4,312  
353 genomes and 4,62,579 proteins  
354 (<https://www.ncbi.nlm.nih.gov/genomes/GenomesGroup.cgi?taxid=28883>) (September  
355 2021) using local blastp (44) with the e-value threshold  $< 2e-20$ . Protein domains were  
356 detected using hmmer (<https://www.ebi.ac.uk/Tools/hmmer/>) with the Pfam-A 35.0

357 database at e-value of  $< 1e-10$ . Phage classification was determined according to National  
358 Center for Biotechnology Information (NCBI) GenBank and ICTV. Average nucleotide  
359 identity was conducted using the `average_nucleotide_identity.py` program in `pyani`  
360 packages (45). MUMmer was used to align nucleotide sequences. AMR genes and  
361 virulence genes were detected using ABRicate version 1.0.1  
362 (<https://github.com/tseemann/abricate>) under default settings. The ResFinder database was  
363 used to extract AMR genes (46), and the Virulence Factors Database (VFDB) was used to  
364 extract virulence genes (47). The packaging mechanism and terminal repeats were analyzed  
365 using Phagetermvirome version 4.0.1 (48), and tRNA was detected using tRNAscan-SE 2.0.  
366 (49). Kp21 and Kp21r SNPs analysis was performed using SNIPPY at default settings (50).

367

## 368 **8. Phage-resistant Kp21 (Kp21r) and Kp22 (Kp22r) strain**

369 Kp21 and Kp22 were cultured with  $\phi$ Kp\_21 or  $\phi$ Kp\_22, respectively at 37°C. After 24 h of  
370 incubation, 1 ml of each culture was centrifuged at 4,400  $\times g$  for 10 min. The supernatant  
371 was discarded and the pellets washed with LB medium. This procedure was repeated twice.  
372 Thereafter, the pellet was resuspended using saline (0.85 % NaCl) and the suspension  
373 plated on LB agar and incubated at 37°C overnight. A single colony was incubated

374 overnight at 37°C with shaking at 200 rpm. Glycerol stock of Kp21r culture was stored at –  
375 80°C until use.

376

### 377 **9. Adsorption assay**

378 Kp21 and Kp21r were cultured in LB medium and incubated at 37°C until  $OD_{600} = 0.5$ .

379 Subsequently,  $3.0 \times 10^6$  pfu  $\phi$ Kp21 was added and incubated at 37°C with shaking at 200

380 rpm for 5 min. Next, 20  $\mu$ l chloroform was added to 200  $\mu$ l of the mixture and vortexed.

381 The samples were then centrifuged at 9,100  $\times g$  for 1 min and the supernatant collected. A

382 100  $\mu$ l aliquot of the supernatant was mixed with Kp21 and plaque assays performed to

383 measure the number of unadsorbed phages. The percentage of the unadsorbed phages was

384 calculated using the formula below:

385 Unadsorbed phage % =  $\frac{\text{the number of phages in supernatant}}{\text{added phages}} \times 100$

386

### 387 **10. Characterization of switched phage sensitivity between Kp21 and Kp21r**

388 The phage sensitivity of Kp21 and Kp21r were examined. Briefly,  $1.0 \times 10^9$  pfu of

389 individual phages used in the phage cocktail was mixed with 100  $\mu$ l of overnight Kp21 or

390 Kp21r culture. Thereafter, 5 ml of 0.6 % soft agar was added to the host and phage mixture

391 and then poured onto LB agar and incubated at 37°C overnight. The colony count was  
392 examined as follows. Kp21 and Kp21r were incubated at 37°C until  $OD_{600} = 0.1$ .  
393 Subsequently, Kp21 was added to  $1.0 \times 10^9$  pfu, and the mixture was incubated at 37°C.  
394 The mixture was collected 2 h after phages were added and centrifuged at  $3,300 \times g$  for 15  
395 min. The supernatant was discarded, and the pellet was suspended in 500  $\mu$ l phosphate-  
396 buffered saline (0.137 M NaCl, 0.27 mM KCl, 0.1 M  $Na_2HPO_4$ , 18 mM  $KH_2PO_4$ ). The  
397 suspension was diluted to  $10^{-2}$  and  $10^{-4}$ , and 100  $\mu$ l of these dilutions was lawned onto LB  
398 agar.

399

#### 400 **11. Data availability**

401 Raw sequence reads for all phages were deposited to DDBJ/EMBL/GenBank under  
402 Bioproject (number: PRJDB14376), and DRA numbers are listed in Table S1. Complete  
403 genome sequences of Kp21 and Kp21r were deposited in GenBank (accession numbers  
404 AP026912 and AP026913).

405

#### 406 **Acknowledgment**



407 This work was partially supported by JSPS KAKENHI (21K1633 to K.K., 18K08455 and  
408 22K08592 to M.K.) from the Ministry of Education, Culture, Sports, Science and Technology  
409 (MEXT), Japan; grants (19lm0203008j0003 A058 and 22ym0126811j0001 A255 to M.K.) from the  
410 Japan Agency for Medical Research and Development (AMED) and grants (JP21fk0108604j0001,  
411 22fk0108604j0002, 21fk0108132j0002 to M.S.) from Research Program on Emerging and Re-  
412 emerging infection Diseases (AMED).

413

#### 414 **References**

- 415 1. Effah CY, Sun T, Liu S, Wu Y. 2020. *Klebsiella pneumoniae*: An increasing threat to public health.  
416 *Ann Clin Microbiol Antimicrob* 19:1–9.
- 417 2. Yamagishi T, Matsui M, Sekizuka T, Ito H, Fukusumi M, Uehira T, Tsubokura M, Ogawa Y,  
418 Miyamoto A, Nakamori S, Tawa A, Yoshimura T, Yoshida H, Hirokawa H, Suzuki S, Matsui T,  
419 Shibayama K, Kuroda M, Oishi K. 2020. A prolonged multispecies outbreak of IMP-6  
420 carbapenemase-producing *Enterobacterales* due to horizontal transmission of the IncN plasmid. *Sci*  
421 *Rep* 10:1–9.
- 422 3. Abe R, Akeda Y, Sugawara Y, Takeuchi D, Matsumoto Y, Motooka D, Yamamoto N, Kawahara R,  
423 Tomono K, Fujino Y, Hamada S. 2020. Characterization of the Plasmidome Encoding

- 424 Carbapenemase and Mechanisms for Dissemination of Carbapenem-Resistant Enterobacteriaceae .  
425 mSystems 5.
- 426 4. Nordmann P, Naas T, Poirel L. 2011. Global spread of carbapenemase producing Enterobacteriaceae.  
427 Emerg Infect Dis 17:1791–1798.
- 428 5. Kayama S, Shigemoto N, Kuwahara R, Oshima K, Hirakawa H, Hisatsune J, Jové T, Nishio H,  
429 Yamasaki K, Wada Y, Ueshimo T, Miura T, Sueda T, Onodera M, Yokozaki M, Hattori M, Ohge H,  
430 Sugai M. 2015. Complete nucleotide sequence of the IncN plasmid encoding imp-6 and CTX-M-2  
431 from emerging carbapenem-resistant Enterobacteriaceae in Japan. Antimicrob Agents Chemother  
432 59:1356–1359.
- 433 6. Shigemoto N, Kuwahara R, Kayama S, Shimizu W, Onodera M, Yokozaki M, Hisatsune J, Kato F,  
434 Ohge H, Sugai M. 2012. Emergence in Japan of an imipenem-susceptible, meropenem-resistant  
435 *Klebsiella pneumoniae* carrying bla<sub>IMP-6</sub>. Diagn Microbiol Infect Dis 72:109–112.
- 436 7. Cao F, Wang X, Wang L, Li Z, Che J, Wang L, Li X, Cao Z, Zhang J, Jin L, Xu Y. 2015. Evaluation  
437 of the efficacy of a bacteriophage in the treatment of pneumonia induced by multidrug resistance  
438 *klebsiella pneumoniae* in mice. Biomed Res Int 2015.

- 439 8. Petrovic Fabijan A, Lin RCY, Ho J, Maddocks S, Ben Zakour NL, Iredell JR, Khalid A, Venturini C,  
440 Chard R, Morales S, Sandaradura I, Gilbey T. 2020. Safety of bacteriophage therapy in severe  
441 *Staphylococcus aureus* infection. *Nat Microbiol* 5:465–472.
- 442 9. Dedrick RM, Guerrero-Bustamante CA, Garlena RA, Russell DA, Ford K, Harris K, Gilmour KC,  
443 Soothill J, Jacobs-Sera D, Schooley RT, Hatfull GF, Spencer H. 2019. Engineered bacteriophages for  
444 treatment of a patient with a disseminated drug-resistant *Mycobacterium abscessus*. *Nat Med* 25:730–  
445 733.
- 446 10. Eskenazi A, Lood C, Wubbolts J, Hites M, Balarjishvili N, Leshkasheli L, Askilashvili L, Kvachadze  
447 L, van Noort V, Wagemans J, Jayankura M, Chanishvili N, de Boer M, Nibbering P, Kutateladze M,  
448 Lavigne R, Merabishvili M, Pirnay JP. 2022. Combination of pre-adapted bacteriophage therapy and  
449 antibiotics for treatment of fracture-related infection due to pandrug-resistant *Klebsiella pneumoniae*.  
450 *Nat Commun* 13.
- 451 11. Oechslin F. 2018. Resistance development to bacteriophages occurring during bacteriophage therapy.  
452 *Viruses* 10.
- 453 12. Oechslin F, Piccardi P, Mancini S, Gabard J, Moreillon P, Entenza JM, Resch G, Que YA. 2017.  
454 Synergistic interaction between phage therapy and antibiotics clears *Pseudomonas Aeruginosa*  
455 infection in endocarditis and reduces virulence. *J Infect Dis* 215:703–712.

- 456 13. Schooley RT, Biswas B, Gill JJ, Hernandez-Morales A, Lancaster J, Lessor L, Barr JJ, Reed SL,  
457 Rohwer F, Benler S, Segall AM, Taplitz R, Smith DM, Kerr K, Kumaraswamy M, Nizet V, Lin L,  
458 McCauley MD, Strathdee SA, Benson CA, Pope RK, Leroux BM, Picel AC, Mateczun AJ, Cilwa KE,  
459 Regeimbal JM, Estrella LA, Wolfe DM, Henry MS, Quinones J, Salka S, Bishop-Lilly KA, Young R,  
460 Hamilton T. 2017. Development and use of personalized bacteriophage-based therapeutic cocktails to  
461 treat a patient with a disseminated resistant *Acinetobacter baumannii* infection. *Antimicrob Agents*  
462 *Chemother* 61.
- 463 14. Yerushalmy O, Khalifa L, Gold N, Rakov C, Alkalay-Oren S, Adler K, Ben-Porat S, Kraitman R,  
464 Gronovich N, Ginat KS, Abdalrhman M, Copenhagen-Glazer S, Nir-Paz R, Hazan R. 2020. The  
465 israeli phage bank (IPB). *Antibiotics* 9:1–7.
- 466 15. Nagel T, Musila L, Muthoni M, Nikolich M, Nakavuma JL, Clokie MR. 2022. Phage banks as  
467 potential tools to rapidly and cost-effectively manage antimicrobial resistance in the developing world.  
468 *Curr Opin Virol* 53:101208.
- 469 16. Savalia D, Westblade LF, Goel M, Florens L, Kemp P, Akulenko N, Pavlova O, Padovan JC, Chait  
470 BT, Washburn MP, Ackermann HW, Mushegian A, Gabisonia T, Molineux I, Severinov K. 2008.  
471 Genomic and Proteomic Analysis of phiEco32, a Novel *Escherichia coli* Bacteriophage. *J Mol Biol*  
472 377:774–789.

- 473 17. Mirzaei MK, Eriksson H, Kasuga K, Haggård-Ljungquist E, Nilsson AS. 2014. Genomic, proteomic,  
474 morphological, and phylogenetic analyses of vB-EcoP-SU10, a *Podoviridae* phage with C3  
475 morphology. PLoS One 9:1–19.
- 476 18. Koonjan S, Cooper CJ, Nilsson AS. 2021. Complete genome sequence of vb\_ecop\_su7, a  
477 *Podoviridae* coliphage with the rare c3 morphotype. Microorganisms 9:1–11.
- 478 19. Terwilliger A, Clark J, Karris M, Hernandez-Santos H, Green S, Aslam S, Maresso A. 2021. Phage  
479 therapy related microbial succession associated with successful clinical outcome for a recurrent  
480 urinary tract infection. Viruses 13.
- 481 20. Federici S, Kredon-Russo S, Valdés-Mas R, Kviatcovsky D, Weinstock E, Matiuhin Y, Silberberg Y,  
482 Atarashi K, Furuichi M, Oka A, Liu B, Fibelman M, Weiner IN, Khabra E, Cullin N, Ben-Yishai N,  
483 Inbar D, Ben-David H, Nicenboim J, Kowalsman N, Lieb W, Kario E, Cohen T, Geffen YF, Zelcbuch  
484 L, Cohen A, Rappo U, Gahali-Sass I, Golembo M, Lev V, Dori-Bachash M, Shapiro H, Moresi C,  
485 Cuevas-Sierra A, Mohapatra G, Kern L, Zheng D, Nobs SP, Suez J, Stettner N, Harmelin A, Zak N,  
486 Puttagunta S, Bassan M, Honda K, Sokol H, Bang C, Franke A, Schramm C, Maharshak N, Sartor RB,  
487 Sorek R, Elinav E. 2022. Targeted suppression of human IBD-associated gut microbiota commensals  
488 by phage consortia for treatment of intestinal inflammation. Cell 185:2879-2898.e24.

- 489 21. Anand T, Bera BC, Vaid RK, Barua S, Riyesh T, Virmani N, Hussain M, Singh RK, Tripathi BN.  
490 2016. Abundance of antibiotic resistance genes in environmental bacteriophages. *J Gen Virol*  
491 97:3458–3466.
- 492 22. Gómez-Gómez C, Blanco-Picazo P, Brown-Jaque M, Quirós P, Rodríguez-Rubio L, Cerdà-Cuellar M,  
493 Muniesa M. 2019. Infectious phage particles packaging antibiotic resistance genes found in meat  
494 products and chicken feces. *Sci Rep* 9:1–11.
- 495 23. Kohei K, Mitsuoki K, Motoyuki S, Mariana C. 2021. Distribution of Antimicrobial Resistance and  
496 Virulence Genes within the Prophage-Associated Regions in Nosocomial Pathogens. *mSphere*  
497 0:e00452-21.
- 498 24. Haines MEK, Hodges FE, Nale JY, Mahony J, van Sinderen D, Kaczorowska J, Alrashid B, Akter M,  
499 Brown N, Sauvageau D, Sicheritz-Pontén T, Thanki AM, Millard AD, Galyov EE, Clokie MRJ. 2021.  
500 Analysis of Selection Methods to Develop Novel Phage Therapy Cocktails Against Antimicrobial  
501 Resistant Clinical Isolates of Bacteria. *Front Microbiol* 12:1–15.
- 502 25. Molina F, Simancas A, Ramírez M, Tabla R, Roa I, Rebollo JE. 2021. A New Pipeline for Designing  
503 Phage Cocktails Based on Phage-Bacteria Infection Networks. *Front Microbiol* 12:1–14.
- 504 26. Molina F, Flores MM, Fernández L, Rodríguez MAV. 2022. Systematic analysis of putative phage -  
505 phage interactions on minimum - sized phage cocktails. *Sci Rep* 1–12.

- 506 27. Tanji Y, Shimada T, Yoichi M, Miyanaga K, Hori K, Unno H. 2004. Toward rational control of  
507 *Escherichia coli* O157:H7 by a phage cocktail. *Appl Microbiol Biotechnol* 64:270–274.
- 508 28. Hesse S, Rajaure M, Wall E, Johnson J, Bliskovsky V, Gottesman S. 2020. Phage Resistance in  
509 Multidrug-Resistant *Klebsiella pneumoniae* ST258 Evolves via Diverse Mutations That Culminate in  
510 Impaired Adsorption. *MBio* 11:1–14.
- 511 29. Gordillo Altamirano FL, Barr JJ. 2021. Unlocking the next generation of phage therapy: the key is in  
512 the receptors. *Curr Opin Biotechnol* 68:115–123.
- 513 30. Olszak T, Shneider MM, Latka A, Maciejewska B, Browning C, Sycheva L V., Cornelissen A, Danis-  
514 Wlodarczyk K, Senchenkova SN, Shashkov AS, Gula G, Arabski M, Wasik S, Miroshnikov KA,  
515 Lavigne R, Leiman PG, Knirel YA, Drulis-Kawa Z. 2017. The O-specific polysaccharide lyase from  
516 the phage LKA1 tailspike reduces *Pseudomonas* virulence. *Sci Rep* 7:1–14.
- 517 31. Hao G, Shu R, Ding L, Chen X, Miao Y, Wu J, Zhou H, Wang H. 2021. Bacteriophage SRD2021  
518 recognizing capsular polysaccharide shows therapeutic potential in serotype K47 *Klebsiella*  
519 *pneumoniae* infections. *Antibiotics* 10.
- 520 32. Chegini Z, Khoshbayan A, Taati Moghadam M, Farahani I, Jazireian P, Shariati A. 2020.  
521 Bacteriophage therapy against *Pseudomonas aeruginosa* biofilms: A review. *Ann Clin Microbiol*  
522 *Antimicrob* 19:1–17.

- 523 33. Liao Y-T, Zhang Y, Salvador A, Harden LA, Wu VCH. 2022. Characterization of a T4-like  
524 Bacteriophage vB\_EcoM-Sa451w as a Potential Biocontrol Agent for Shiga Toxin-Producing  
525 Escherichia coli O45 Contaminated on Mung Bean Seeds. *Microbiol Spectr* 10.
- 526 34. Ye N, Nemoto N. 2004. Processing of the tail lysozyme (gp5) of bacteriophage T4. *J Bacteriol*  
527 186:6335–6339.
- 528 35. Burmeister AR, Fortier A, Roush C, Lessing AJ, Bender RG, Barahman R, Grant R, Chan BK, Turner  
529 PE. 2020. Pleiotropy complicates a trade-off between phage resistance and antibiotic resistance. *Proc*  
530 *Natl Acad Sci U S A* 117.
- 531 36. Gurney J, Pradier L, Griffin JS, Gougat-Barbera C, Chan BK, Turner PE, Kaltz O, Hochberg ME.  
532 2020. Phage steering of antibiotic-resistance evolution in the bacterial pathogen, *Pseudomonas*  
533 *aeruginosa*. *Evol Med Public Heal* 2020:148–157.
- 534 37. Liu CG, Green SI, Min L, Clark JR, Salazar KC, Terwilliger AL, Kaplan HB, Trautner BW, Ramig  
535 RF, Maresso AW. 2020. Phage-antibiotic synergy is driven by a unique combination of antibacterial  
536 mechanism of action and stoichiometry. *MBio* 11:1–19.
- 537 38. Nakamura K, Fujiki J, Nakamura T, Furusawa T, Gondaira S, Usui M, Higuchi H, Tamura Y, Iwano  
538 H. 2021. Fluctuating Bacteriophage-induced galU Deficiency Region is Involved in Trade-off Effects  
539 on the Phage and Fluoroquinolone Sensitivity in *Pseudomonas aeruginosa*. *Virus Res* 306:198596.



- 540 39. Roach DR, Donovan DM. 2015. Antimicrobial bacteriophage-derived proteins and therapeutic  
541 applications. *Bacteriophage* 5:e1062590.
- 542 40. Uchiyama J, Rashel M, Maeda Y, Takemura I, Sugihara S, Akechi K, Muraoka A, Wakiguchi H,  
543 Matsuzaki S. 2008. Isolation and characterization of a novel *Enterococcus faecalis* bacteriophage  
544  $\phi$ EF24C as a therapeutic candidate. *FEMS Microbiol Lett* 278:200–206.
- 545 41. Kitamura N, Sasabe E, Matsuzaki S, Daibata M, Yamamoto T. 2020. Characterization of two newly  
546 isolated *Staphylococcus aureus* bacteriophages from Japan belonging to the genus *Silviavirus*. *Arch*  
547 *Viro* 165:2355–2359.
- 548 42. Seemann T. 2014. Prokka: Rapid prokaryotic genome annotation. *Bioinformatics* 30:2068–2069.
- 549 43. Tatusova T, Dicuccio M, Badretdin A, Chetvernin V, Nawrocki P, Zaslavsky L, Lomsadze A, Pruitt  
550 KD, Borodovsky M, Ostell J. 2016. NCBI prokaryotic genome annotation pipeline 44:6614–6624.
- 551 44. Altschul SF, Gish W, Miller W, Myers EW, Lipman DJ. 1990. Basic local alignment search tool. *J*  
552 *Mol Biol* 215:403–410.
- 553 45. Pritchard L, Glover RH, Humphris S, Elphinstone JG, Toth IK. 2016. Genomics and taxonomy in  
554 diagnostics for food security: Soft-rotting enterobacterial plant pathogens. *Anal Methods* 8:12–24.

- 555 46. Zankari E, Hasman H, Cosentino S, Vestergaard M, Rasmussen S, Lund O, Aarestrup FM, Larsen  
556 MV. 2012. Identification of acquired antimicrobial resistance genes. *J Antimicrob Chemother*  
557 67:2640–2644.
- 558 47. Chen L, Zheng D, Liu B, Yang J, Jin Q. 2016. VFDB 2016: Hierarchical and refined dataset for big  
559 data analysis - 10 years on. *Nucleic Acids Res* 44:D694–D697.
- 560 48. Garneau JR, Legrand V, Marbouty M, Press MO, Vik DR, Fortier LC, Sullivan MB, Bikard D, Monot  
561 M. 2021. High-throughput identification of viral termini and packaging mechanisms in virome  
562 datasets using PhageTermVirome. *Sci Rep* 11:1–9.
- 563 49. Chan PP, Lin BY, Mak AJ, Lowe TM. 2021. TRNAscan-SE 2.0: Improved detection and functional  
564 classification of transfer RNA genes. *Nucleic Acids Res* 49:9077–9096.
- 565 50. Page AJ, Taylor B, Delaney AJ, Soares J, Seemann T, Keane JA, Harris SR. 2016. SNP-sites: rapid  
566 efficient extraction of SNPs from multi-FASTA alignments. *Microb genomics* 2:e000056.

567

## 568 **Figure Legends**

569 Fig. 1 Transmission electron microscopy images of 29 isolated phages. Each sample was  
570 negatively stained and magnified at  $\times 50,000$ . øKp\_1 and øKp\_22 are shown as  
571 representative *Tevenviridae*. All *Podoviridae* and *Siphoviridae* are shown. The bar  
572 represents 200 nm in individual images.

573

574 Fig. 2 Heatmap of the host range in each phage. X and Y axes represent phages and host  
575 strains, respectively. *Klebsiella pneumoniae* ATCC BAA 1705 and ATCC BAA  
576 1706 were used as standard strains, and *Escherichia coli* SK191 and BL21 were used  
577 as control strains. The color in the heatmap represents the EOP. Bar charts on the X-  
578 and Y-axes represent the number of infections in each phage and host, respectively.

579

580 Fig. 3 OD<sub>600</sub> kinetics indicator bacteria incubated with phage. Bacterial strains were  
581 incubated up to OD<sub>600</sub> = 0.1, following which each phage was added at 10<sup>9</sup> pfu/ml.  
582 OD<sub>600</sub> was monitored at appropriate times until 24 h. No phage was added in Kp21  
583 and Kp22 for the negative control. All experiments in this section were performed in  
584 triplicate.

585 Fig. 4 Cocktail experiment of Kp21r and Kp22r. Phage-resistant Kp21 (Kp21r) and Kp22  
586 (Kp22r) were derived from the culture medium after 24 h incubation with  $\phi$ Kp\_21 or  
587  $\phi$ Kp\_22. The cocktail consisted of 10 phages, and each phage was at  $10^7$  pfu/ml.  
588 OD<sub>600</sub> was monitored at appropriate times until 24 h. All experiments in this section  
589 were performed in triplicate.

590

591 Fig. 5 Analysis of the shifting in susceptibility to the phage cocktail in f22 and f22r. (A) the  
592 host range in f22 and f22r was investigated against 10 phages comprising a phage  
593 cocktail. “S” represents a sparse bacterial lawn. (B) Colony forming units are  
594 mentioned under each phage. f22 or f22r were mixed with individual phages, and 2 h  
595 after phage addition, samples were diluted to  $10^{-2}$  and  $10^{-4}$ , and lawned onto LB  
596 plates. n.d. means that colonies were not detected at the  $10^{-2}$  condition.

597

598 Fig. 6 Characterization of phage-resistant Kp21r strain. (A) Adsorption assay of  $\phi$ Kp\_21  
599 against Kp21 and Kp21r strains. Kp21 and Kp21r were incubated until OD<sub>600</sub> = 0.5,  
600 following which  $\phi$ Kp\_21 was added at  $10^7$  pfu/ml and incubated at 37°C with  
601 shaking at 200 rpm. After 5 min, 200  $\mu$ l of the mixture was withdrawn and

602 centrifuged at  $9,100 \times g$  for 1 min. The number of phages in the supernatant was  
603 measured. (B)  $1.0 \times 10^9$  pfu of  $\phi$ Kp\_21 was mixed with 100  $\mu$ l of overnight Kp21 or  
604 Kp21r culture. Thereafter, 5 ml of 0.6 % soft agar was added to the host and phage  
605 mixture and incubated at  $37^\circ\text{C}$  overnight. n.d. means that plaques were not detected.  
606 (C) Nucleotide sequences of *cpsA* in Kp21 and Kp21r were aligned using ClustalW  
607 (<http://clustalw.ddbj.nig.ac.jp/>). Insertion mutation (A) is shown by an arrow, and the  
608 stop codons of *cspA* in f22 and f22r are shown by a square.

609

610

611

612 Fig. S1 All TEM images of *Myoviridae* in this study. The bar represents 200 nm in  
613 individual images.

614

615 Fig. S2 Correlation between plaque size and EOP. Plaque size ( $\text{mm}^2$ ) and EOP in the  
616 phages were measured in representative phage strains. The X- and Y-axes show the  
617 EOP in each phage and plaque size, respectively. A maximum of 10 plaques were  
618 randomly selected in individual phage-host combinations and plaque sizes were

619 measured using ImageJ. Python packaging Seaborn was used to visualize the  
620 correlation, and R correlation in each combination was calculated using Scipy  
621 version 1. 8. 1.

622

## 623 **Tables**

624 Table S1 The genomic information of phages isolated in Japan. Genome assembly was  
625 performed using Shovill with default settings. Phage contigs were filtered with the  
626 contig length < 200 and/or coverage < 25. “CDS after filtered” and “contigd\_filtered”  
627 columns represent the number of CDS from the filtered contigs. The packaging  
628 mechanism and terminal repeats in each phage were presumed using  
629 Phagetermvirome.

630

631 Table S2 The table of host range and EOP for all host-phage combination. EOP was  
632 calculated by plaques of individual phage and host combination divided by plaques  
633 of indicator host and phage combination.

634

635 Table S3 The list of the domain prediction for each phage protein. Pfam-A 27 was used as

636 phage database.

637

638 Table S4 The list of SNPs between Kp21 and Kp21r. SNPs were detected using Snippy as

639 default settings.

Fig. 1

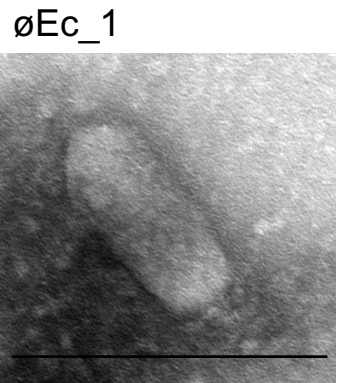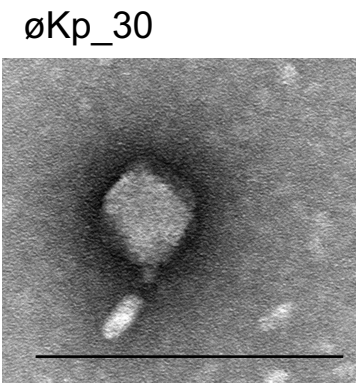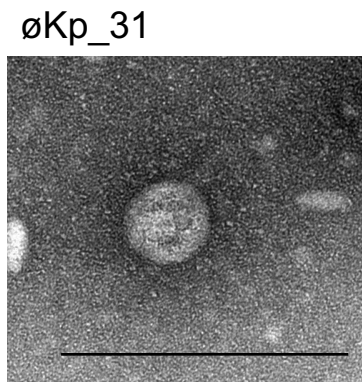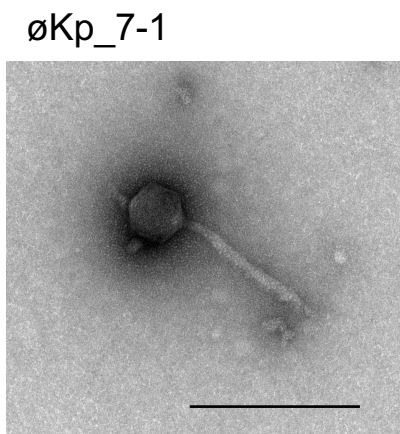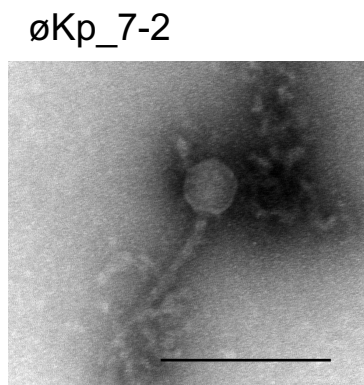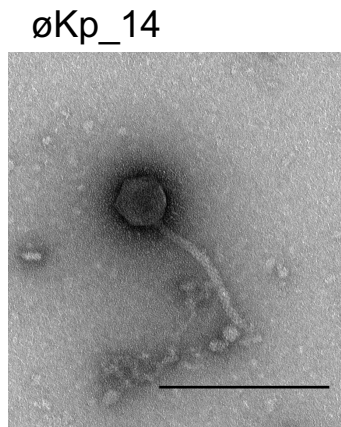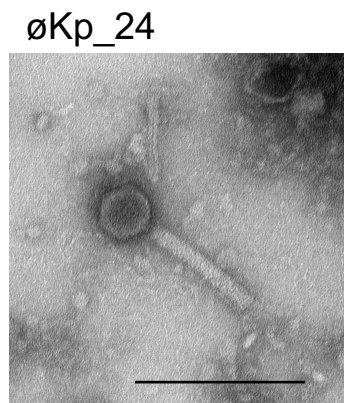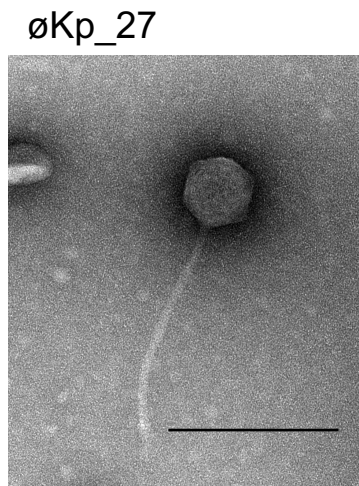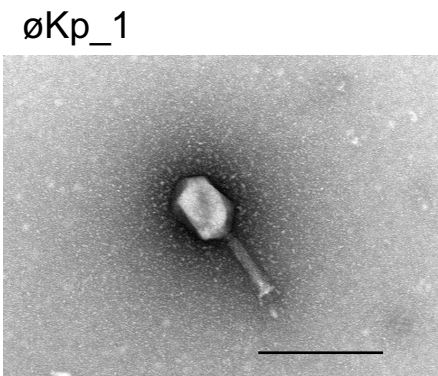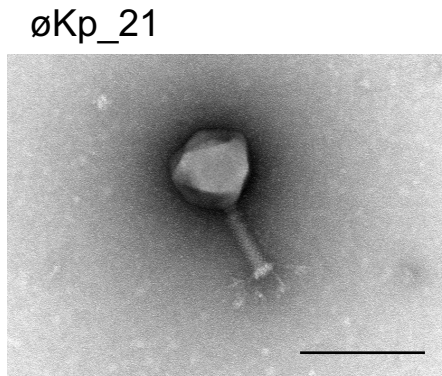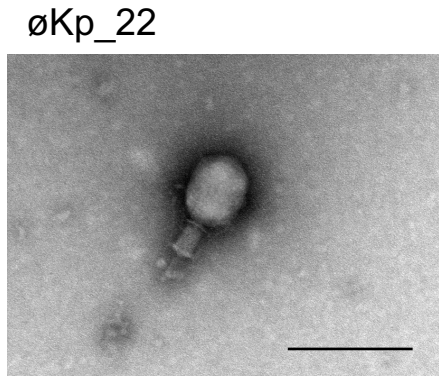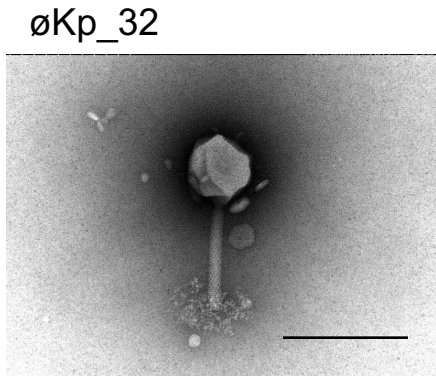



Fig. 2

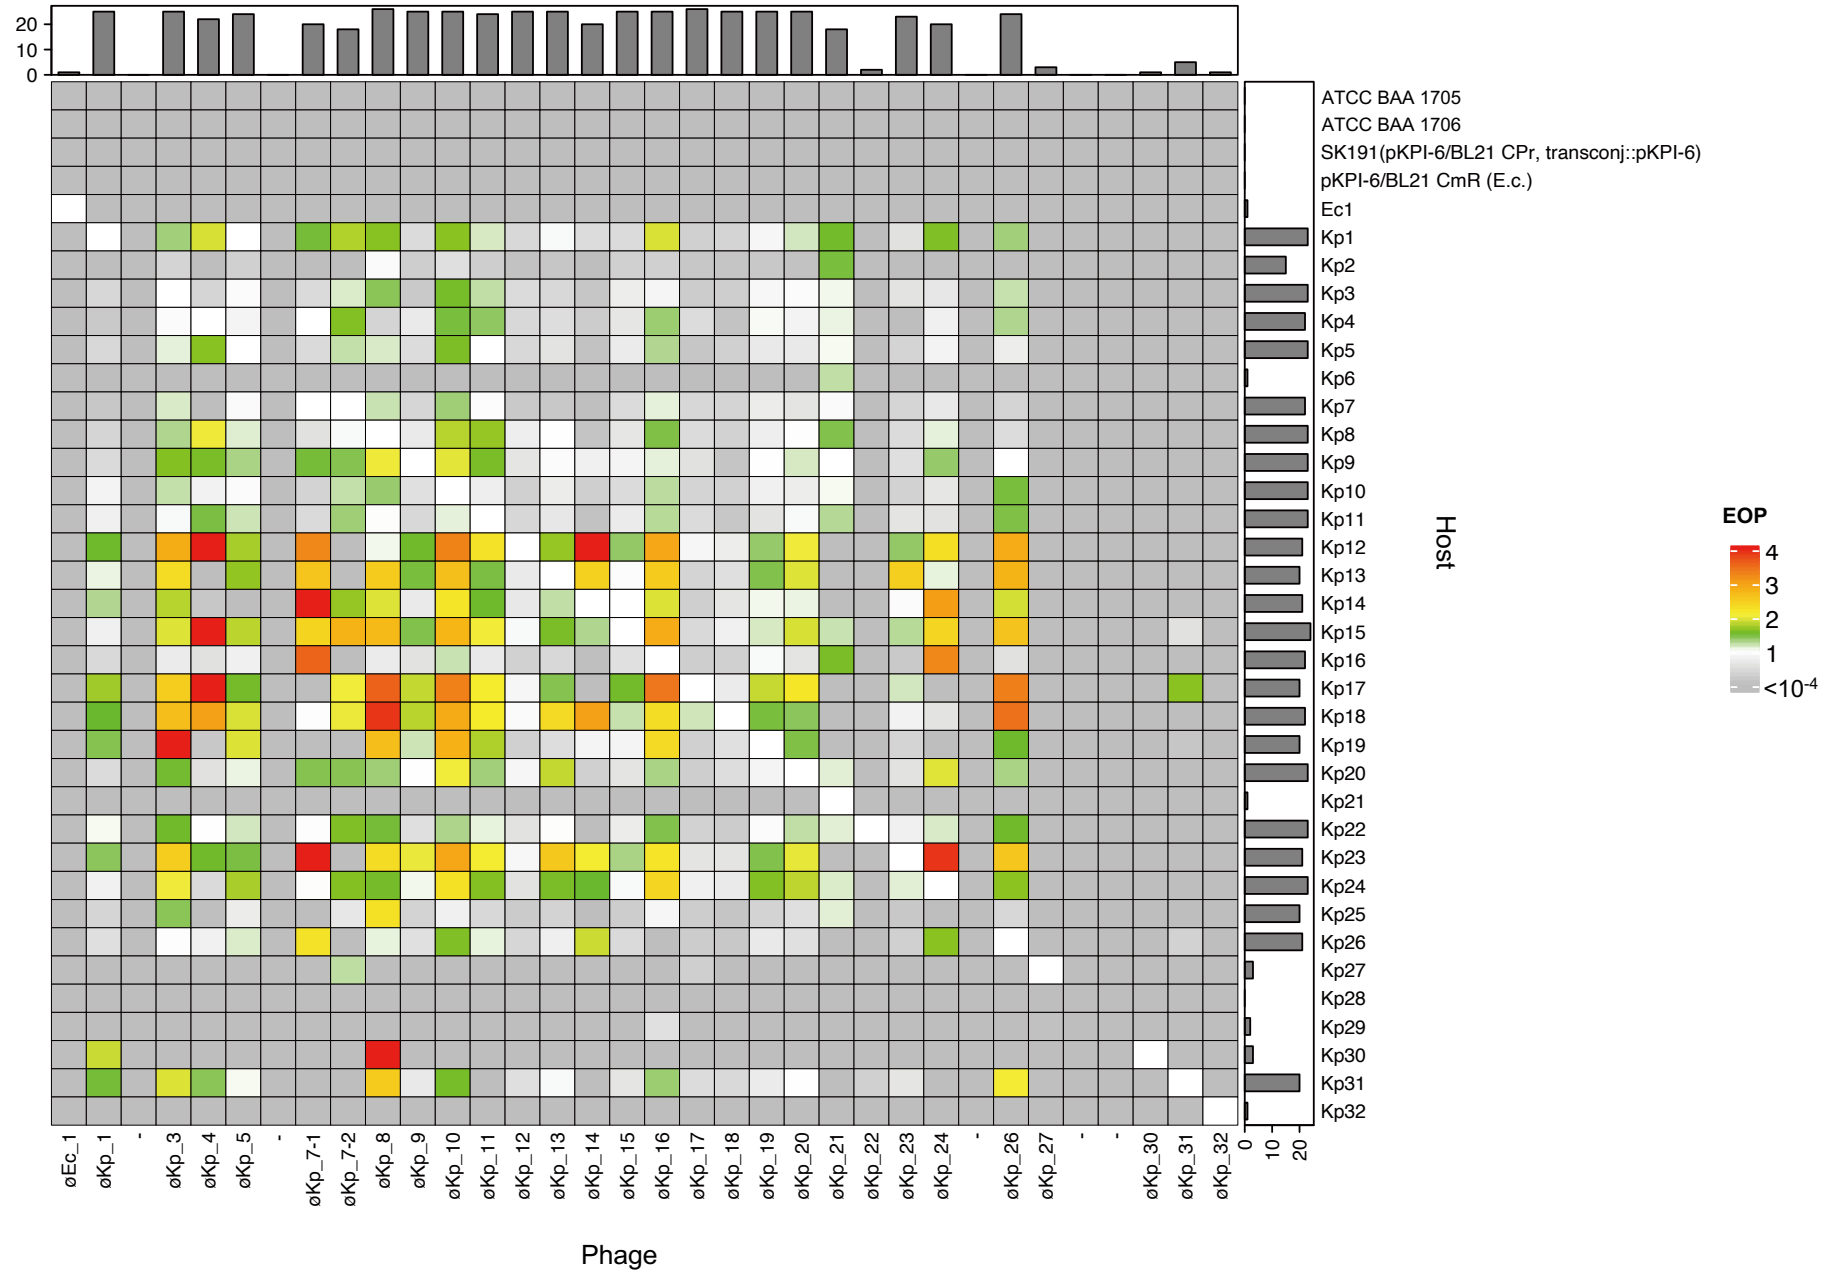

Fig. 3

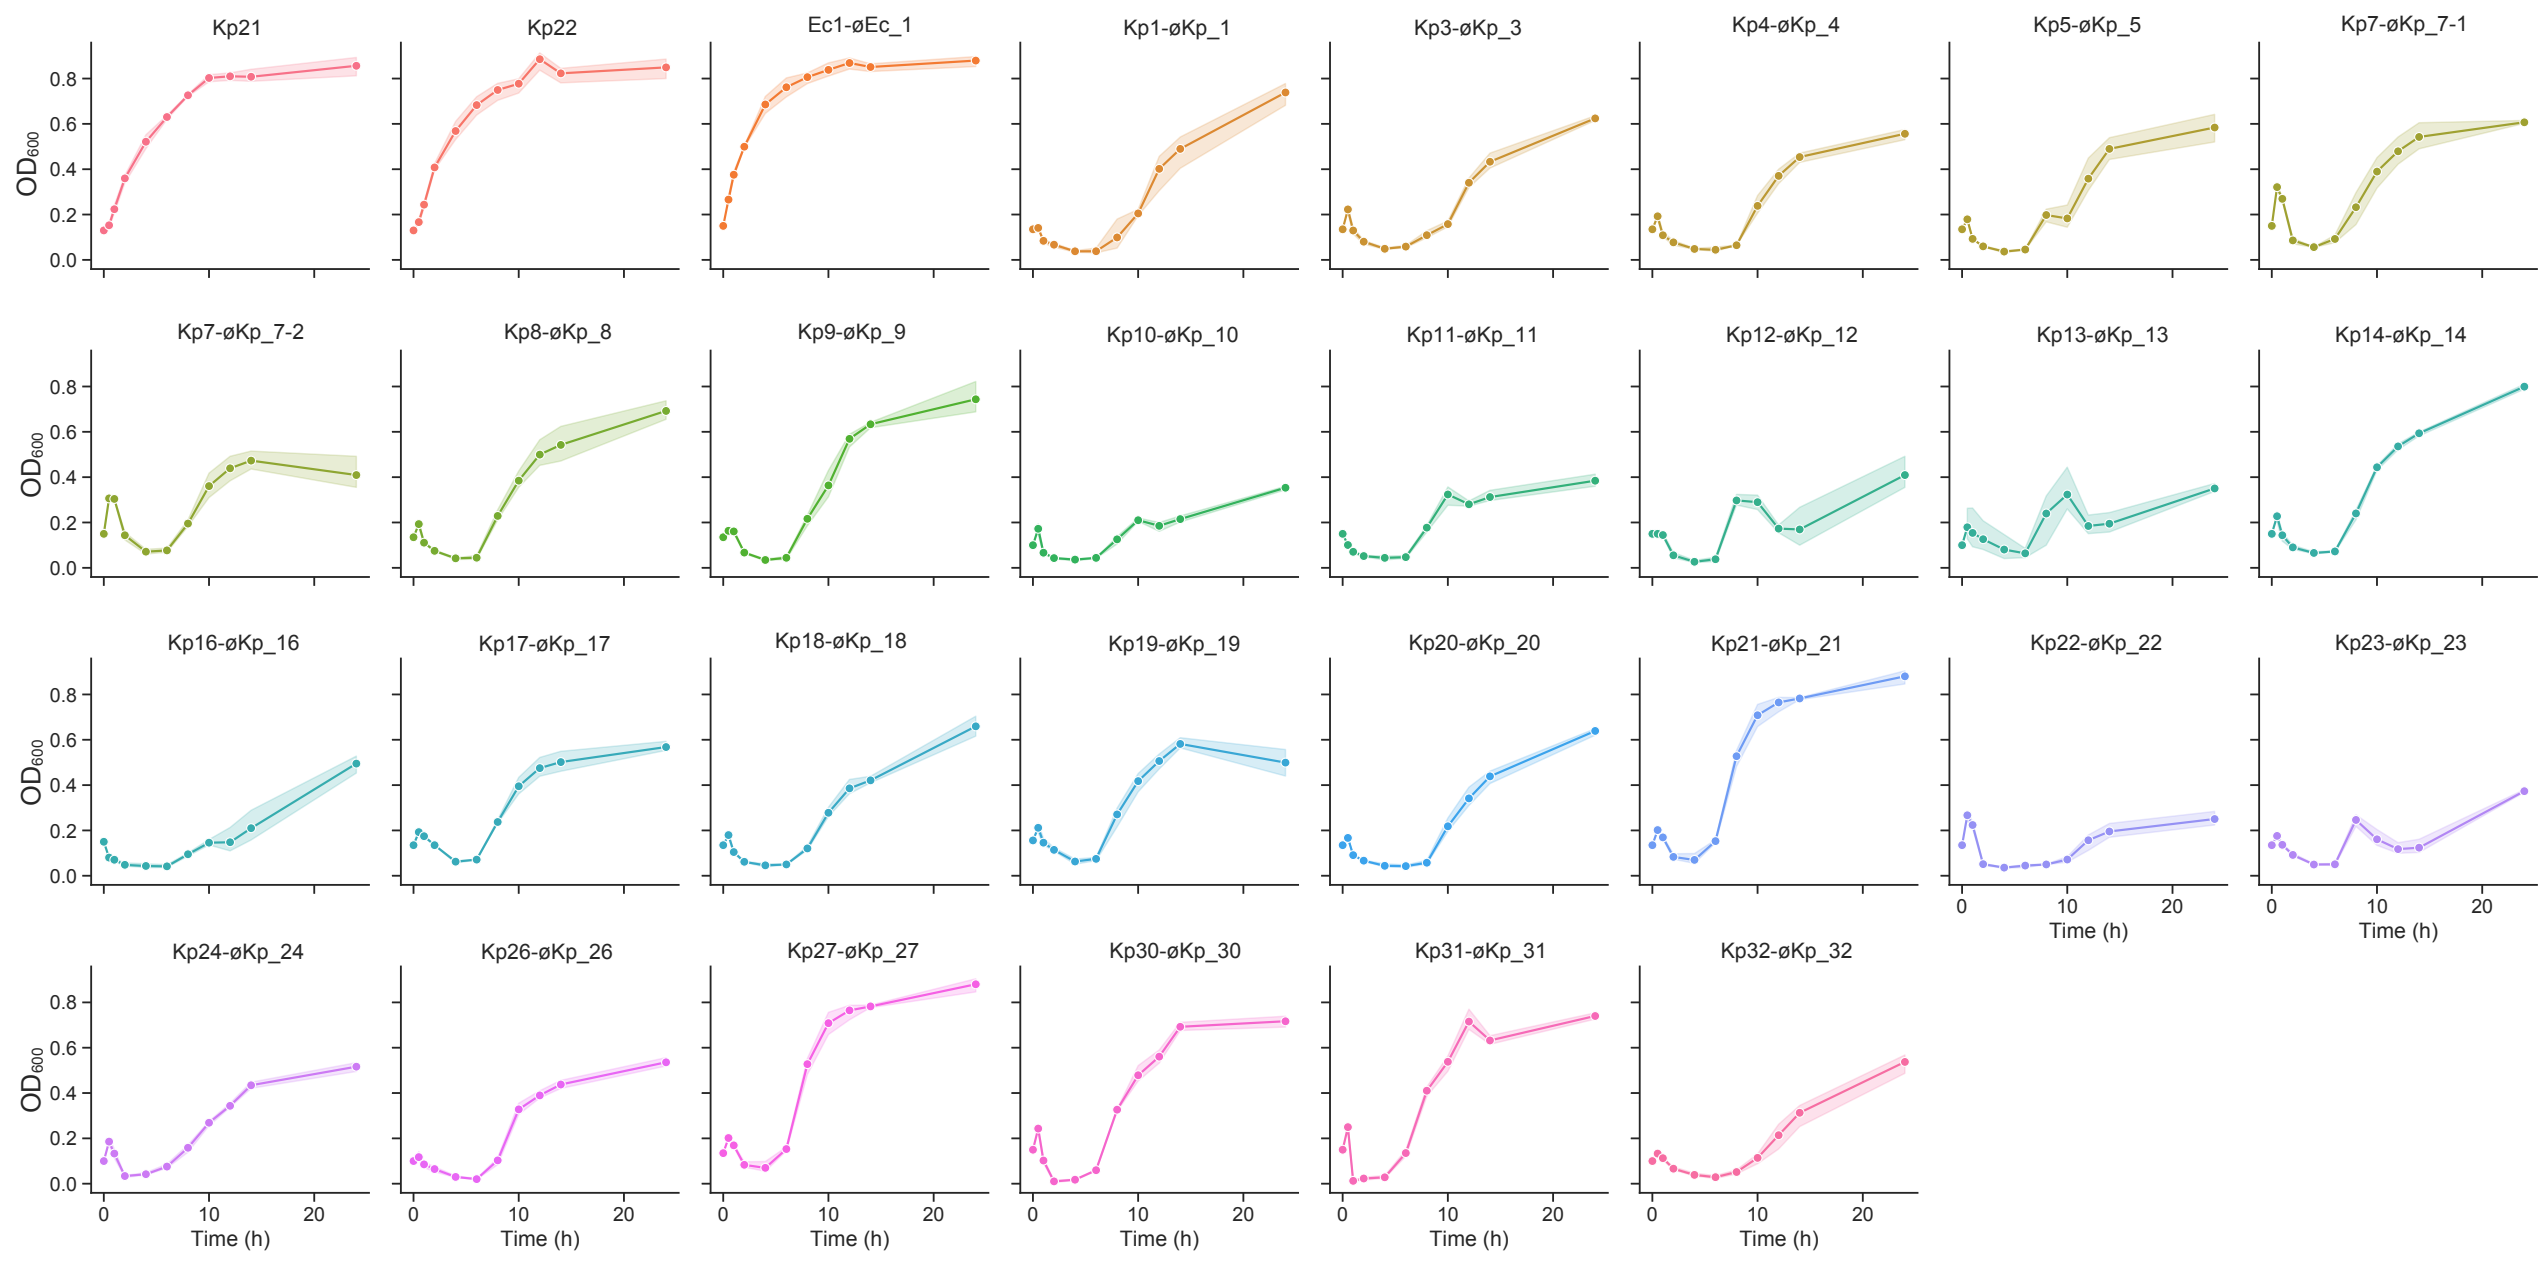

Fig. 4

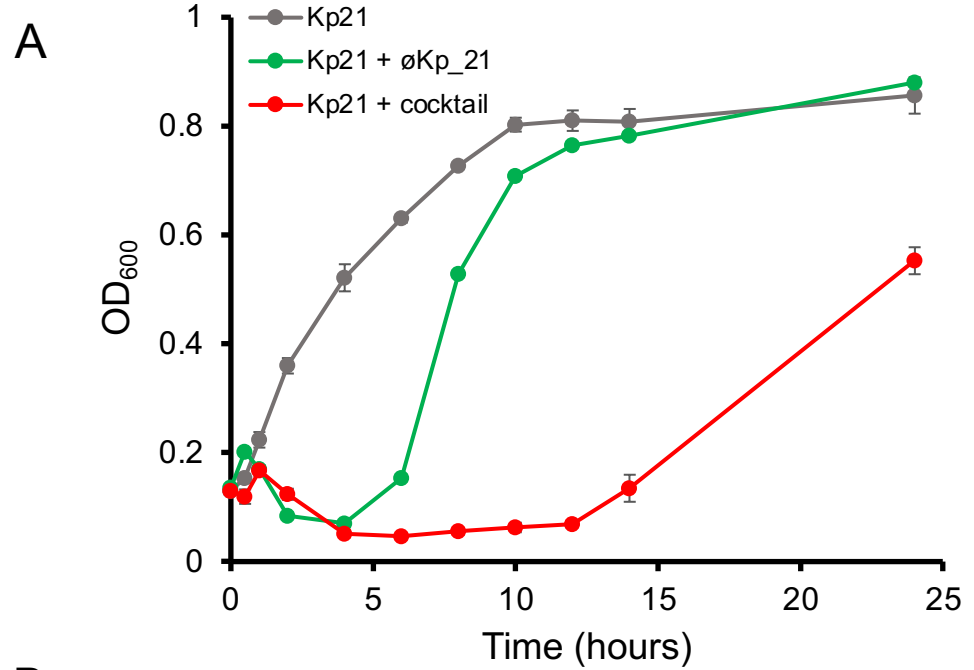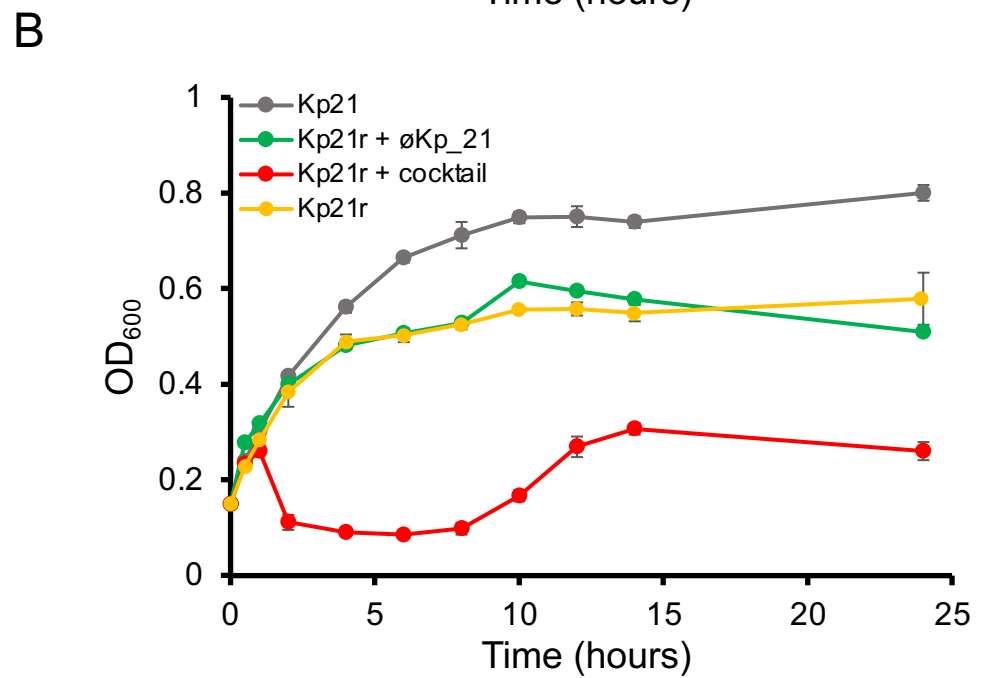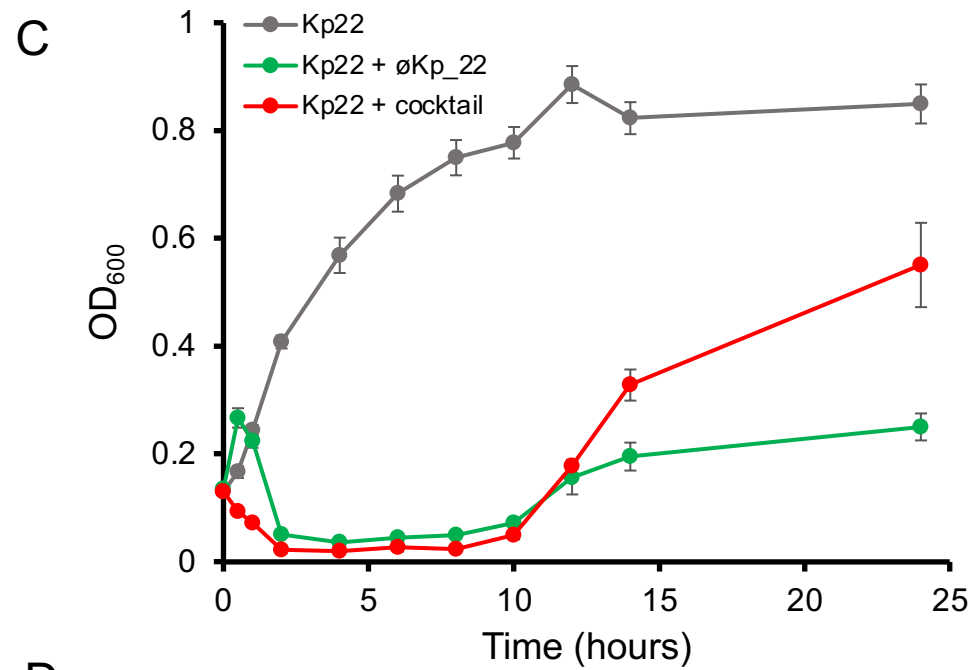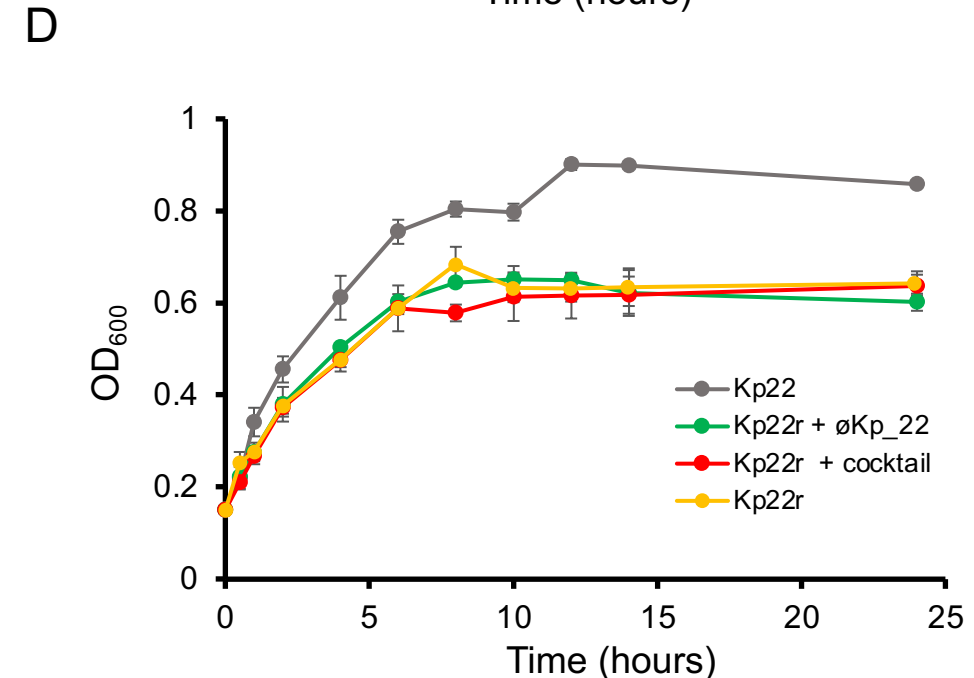

Fig. 5

A

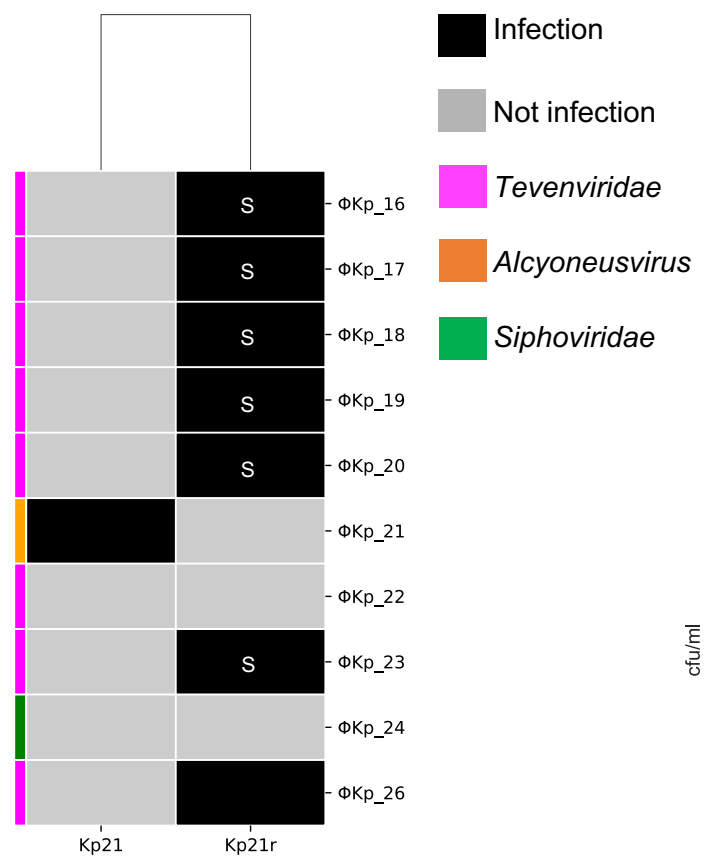

B

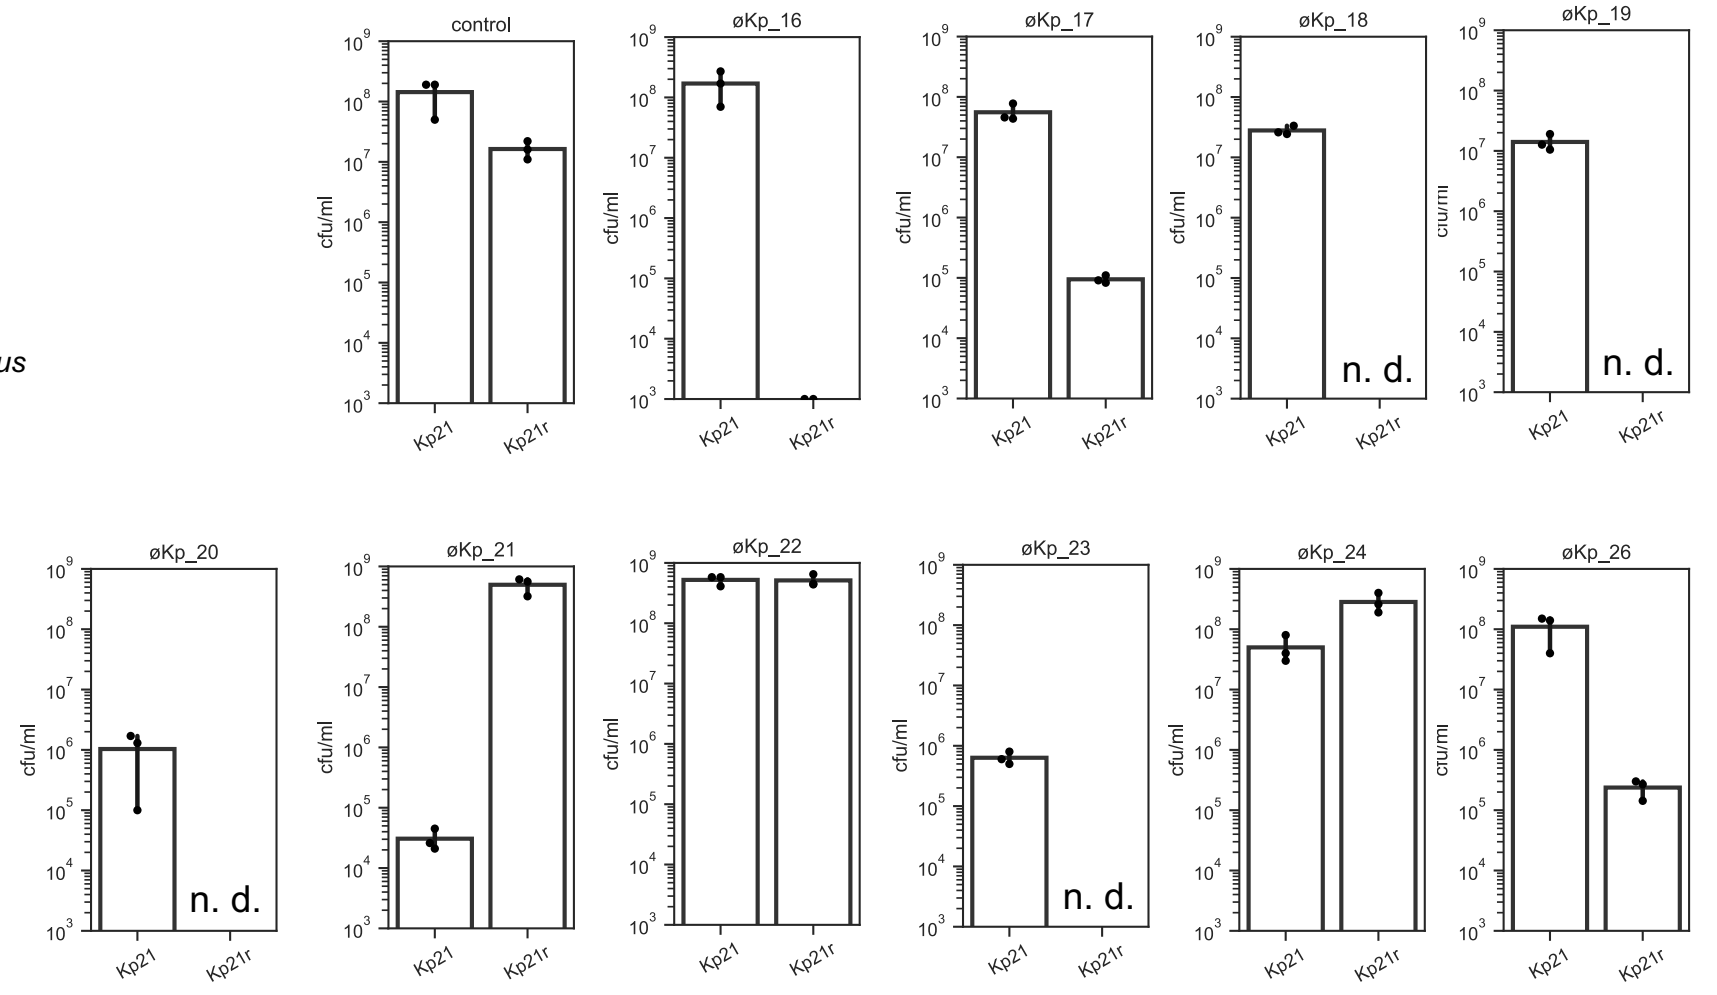



Fig. S1

øKp\_3

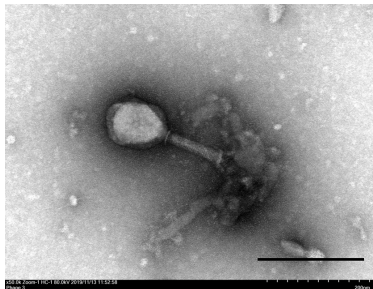

øKp\_4

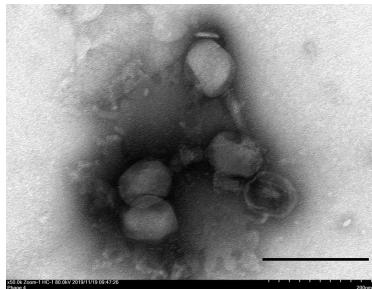

øKp\_5

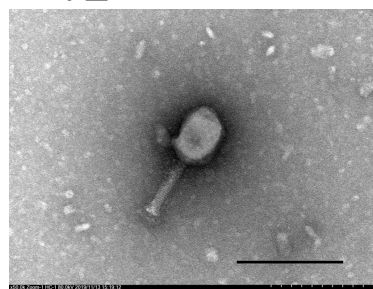

øKp\_8

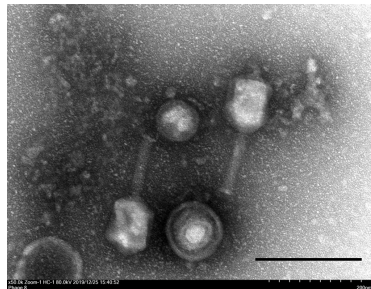

øKp\_9

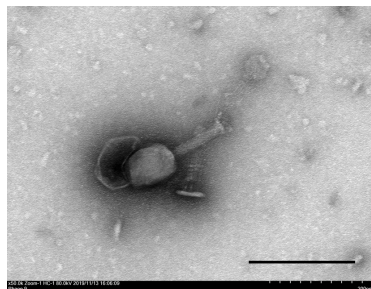

øKp\_10

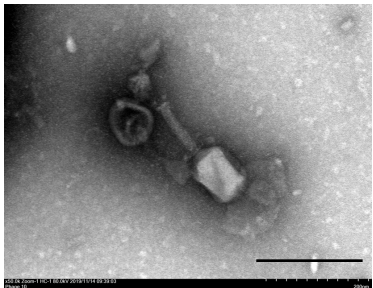

øKp\_11

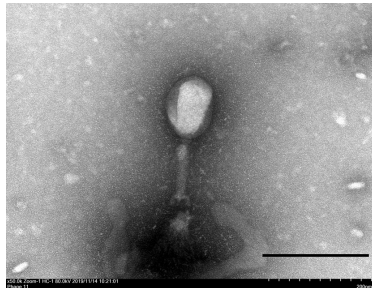

øKp\_12

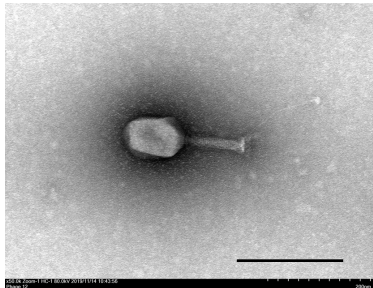

øKp\_13

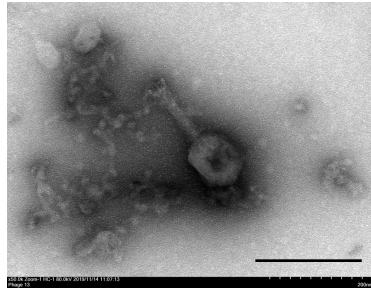

øKp\_15

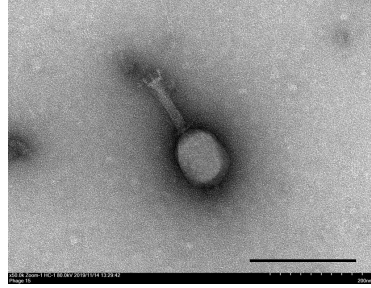

øKp\_16

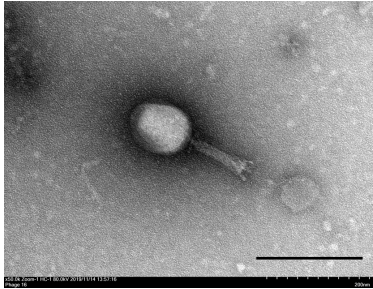

øKp\_17

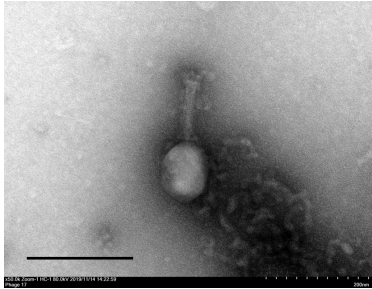

øKp\_18

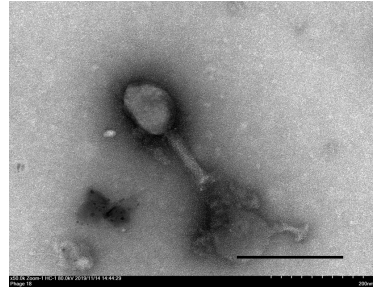

øKp\_19

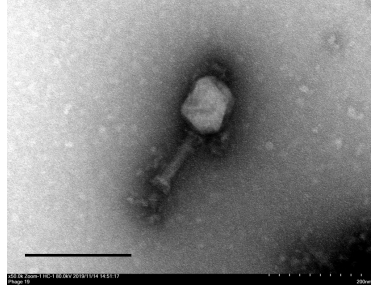

øKp\_20

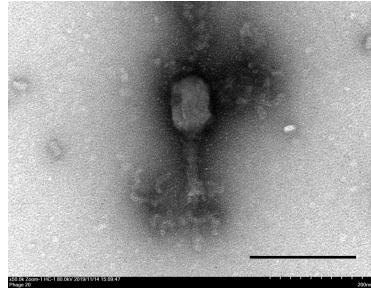

øKp\_23

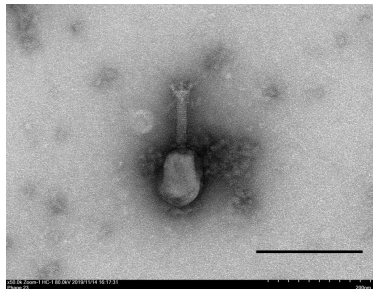

øKp\_26

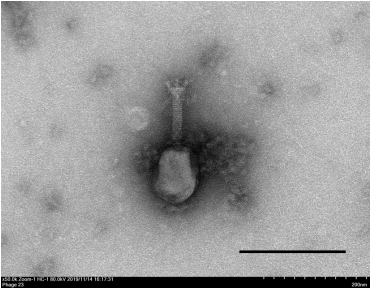

Fig. S2

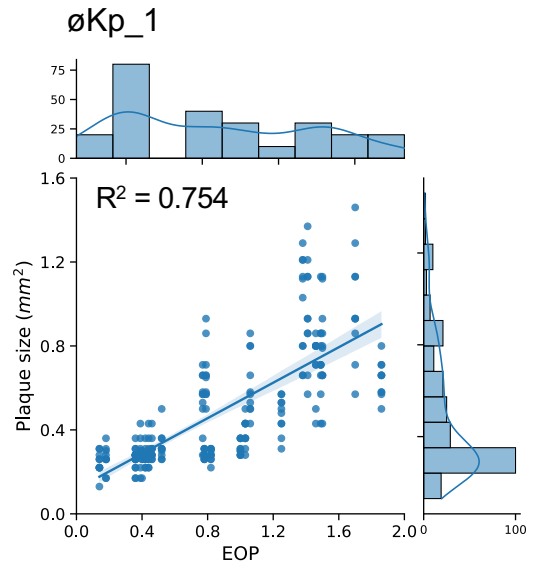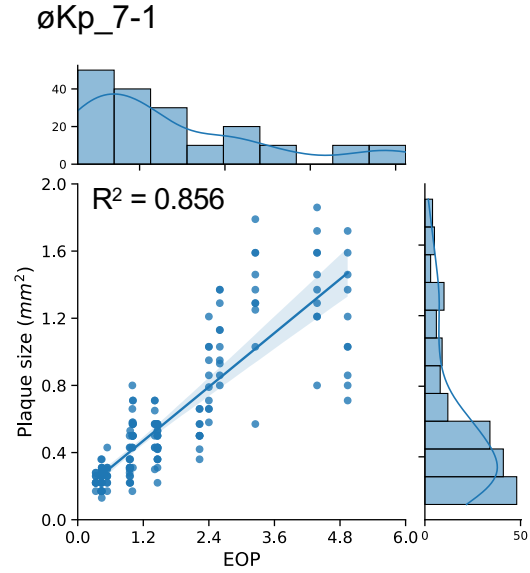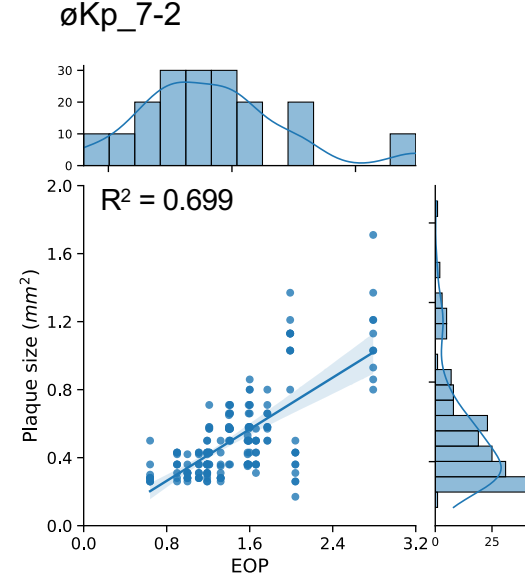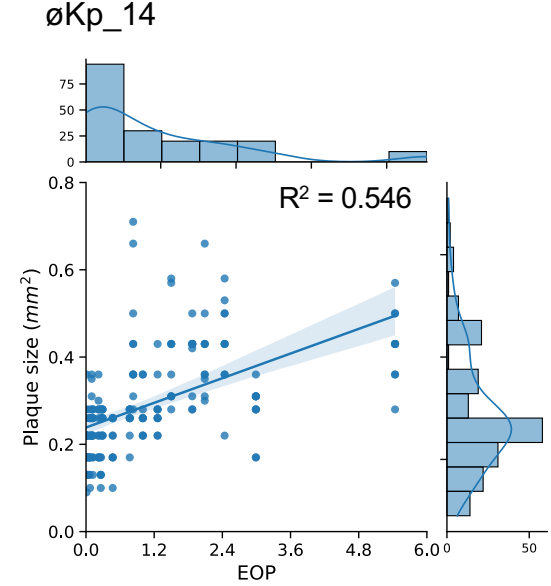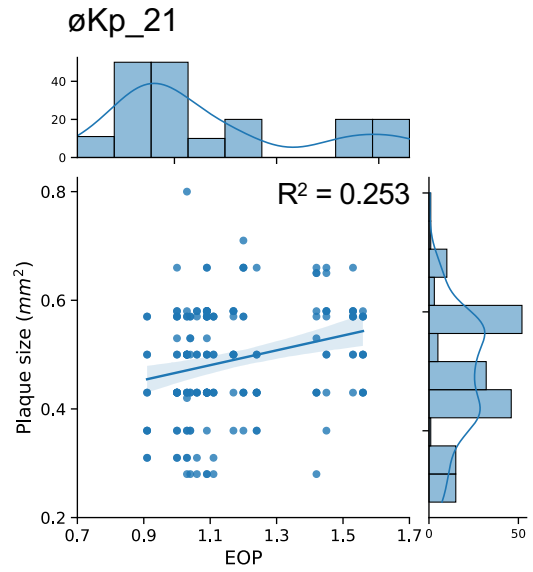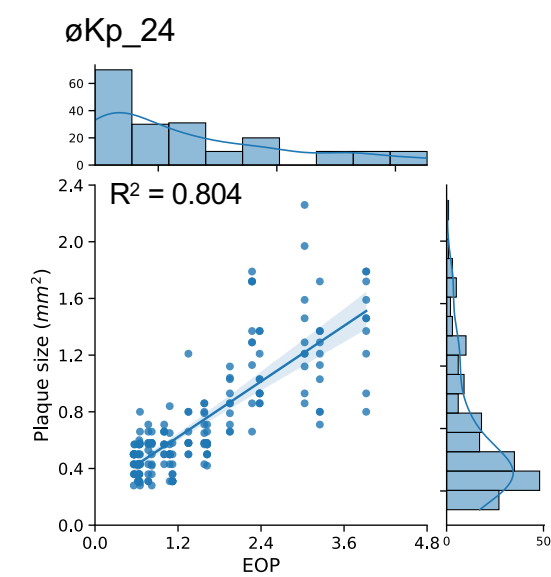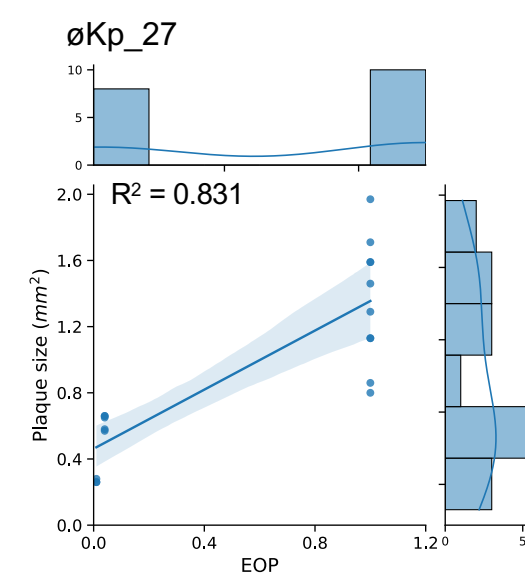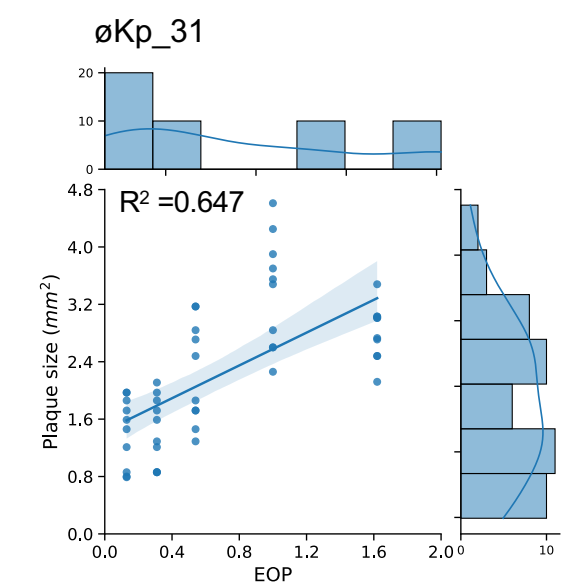

Source: https://www.biorxiv.org/content/10.1101/2022.11.05.515272v1.full.pdf
